1 **Homeostatic scaling is driven by a translation-dependent degradation axis that recruits**  
2 **miRISC remodelling**

3 Balakumar Srinivasan<sup>1#</sup>, Sarbani Samaddar<sup>1#</sup>, Sivaram V.S. Mylavarapu<sup>2</sup>, James P. Clement<sup>3</sup>  
4 and Sourav Banerjee<sup>1§</sup>

5 1. National Brain Research Centre, NH-8. Nainwal Mode, Manesar-122052, Haryana, India

6 2. Regional Centre for Biotechnology, NCR-Biotech Science Cluster, Faridabad-Gurgaon  
7 Expressway, Faridabad-121001, Haryana, India

8 3. Neuroscience Unit, Jawaharlal Nehru Centre for Advanced Scientific Research, Jakkur,  
9 Bengaluru-560064, Karnataka, India.

10 # These authors contributed equally to this work

11 § Correspondence

12 [souravnbrc@gmail.com](mailto:souravnbrc@gmail.com) OR [sourav@nbrc.ac.in](mailto:sourav@nbrc.ac.in) (S.B)

13

14

15

16

17

18

## 19 **Abstract**

20 Homeostatic scaling in neurons has been majorly attributed to the individual contribution of  
21 either translation or degradation; however there remains limited insight towards understanding  
22 how the interplay between the two processes effectuates synaptic homeostasis. Here, we  
23 report that a co-dependence between the translation and degradation mechanisms drives  
24 synaptic homeostasis whereas abrogation of either prevents it. Coordination between the two  
25 processes is achieved through the formation of a tripartite complex between translation  
26 regulators, the 26S proteasome and the miRNA-induced-silencing-complex (miRISC)  
27 components such as MOV10 and Trim32 on actively translating transcripts or polysomes.  
28 Disruption of polysomes abolishes this ternary interaction, suggesting that translating RNAs  
29 facilitate the combinatorial action of the proteasome and the translational apparatus. We  
30 identify that synaptic downscaling involves miRISC remodelling which entails the mTOR-  
31 dependent translation of Trim32, an E3 ligase and the subsequent degradation of its target,  
32 MOV10. MOV10 degradation is sufficient to invoke downscaling by enhancing Arc expression  
33 and causing the subsequent removal of post-synaptic AMPA receptors. We propose a  
34 mechanism that exploits a translation-driven degradation paradigm to invoke miRISC  
35 remodelling and induce homeostatic scaling during chronic network activity.

## 36 **Introduction:**

37 Neurons employ a unique stratagem, known as synaptic scaling, to counter the run-away  
38 excitation and subsequent loss of input specificity that arise due to Hebbian changes; they rely  
39 on a compensatory remodelling of synapses throughout the network while maintaining  
40 differences in their synaptic weightage (Burrone & Murthy, 2003; Keck *et al*, 2017; Turrigiano,  
41 2017; Turrigiano & Nelson, 2004; Vitureira & Goda, 2013; Pozo & Goda, 2010). A complex

42 interplay of sensors and effectors within neurons serve to oppose global fluctuations in a  
43 network and establish synaptic homeostasis by modifying post-synaptic glutamatergic currents  
44 in a cell-autonomous manner (Davis, 2006; Ibata *et al*, 2008; Wierenga *et al*, 2006). In the  
45 context of homeostatic scaling, ‘sensors’ are classified as molecules that sense deviations in  
46 the overall network activity and ‘effectors’ scale the neuronal output commensurately.

47 Few molecular sensors of scaling have been identified to date; the eukaryotic elongation factor  
48 eEF2 and its dedicated kinase, eEF2 kinase or CamKIII are the two reported thus far (Sutton  
49 *et al*, 2007). However, there remains a huge chasm in identifying the repertoire of molecular  
50 cascades that serve to link events where neurons sense deviations in the network firing rate  
51 and subsequently initiate the scaling process. One such cascade is the mTORC1 (mammalian  
52 Target Of Rapamycin Complex-1) signalling pathway that regulates presynaptic compensation  
53 by promoting BDNF synthesis in the post-synaptic compartment (Henry *et al*, 2012, 2018). In  
54 contrast, AMPA-receptors (AMPA-Rs) have been identified, by overwhelming consensus, to be  
55 the predominant “end-point-effectors” in all paradigms of synaptic scaling (Gainey *et al*, 2009;  
56 O’Brien *et al*, 1998; Tataavarty *et al*, 2013; Thiagarajan *et al*, 2005). Unlike NMDARs, AMPARs  
57 undergo *de novo* translation during network destabilizations (Sutton *et al*, 2006) and chronic  
58 changes in the post-synaptic response during scaling has been attributed to the abundance of  
59 surface AMPARs (GluA1 and GluA2 subunits) (Lissin *et al*, 1998). Among the key modifiers of  
60 AMPAR expression, miRNAs are known to play pivotal roles in synaptic scaling (Hou *et al*,  
61 2015; Letellier *et al*, 2014; Rajman *et al*, 2017; Silva *et al*, 2019). Relief from translational  
62 repression by miRNAs necessitates that mRNAs exit the functional miRISC, which entails that  
63 the latter undergo dynamic changes in its composition (Banerjee *et al*, 2009; Kenny *et al*,

64 2014). What remains surprising however, is our lack of knowledge about how compositional  
65 changes within the miRISC are achieved during the restoration of homeostasis.

66 The requirement for discrete sets of sensors and effectors is fulfilled within neurons through  
67 varied mechanisms including translation and ubiquitin-mediated proteasomal (UPS)  
68 degradation. An enhanced degradation of post-synaptic-density (PSD) proteins including  
69 GluA1 and GluA2 has been observed in contexts of altered network excitability (Ehlers, 2003)  
70 whereas complete inhibition of UPS activity was shown to occlude synaptic compensation  
71 (Jakawich *et al*, 2010). The integral role of *de novo* translation in sculpting the neuronal  
72 proteome was recently highlighted when proteomic analysis of neurons undergoing upscaling  
73 and downscaling revealed a remarkable diversity of newly synthesized proteins. Of particular  
74 interest was the significant enrichment in the expression of the proteasome core complex  
75 during the downscaling of synaptic activity (Schanzenbacher *et al*, 2016, 2018). The demand  
76 for the translation of proteasome complexes implies that proteasomes work alongside  
77 translation mechanisms during downscaling. Reports documenting the co-localization of  
78 ribosomes and the proteasome in neuronal dendrites (Bingol & Schuman, 2006; Ostroff *et al*,  
79 2002) further emphasize the possibility that these two opposing machineries physically interact  
80 within the post-synaptic microcosm. The remodelling of the proteome through the dynamic  
81 regulation of protein biogenesis and degradation has been termed as cellular 'proteostasis'  
82 (Hanus & Schuman, 2013). However, several questions remain unexplored in the context of  
83 homeostatic scaling, such as a) what factor establishes the link between translation and  
84 protein degradation machineries to shape the proteome during scaling? b) Which process  
85 among translation and degradation takes precedence? c) What are the signalling mechanisms



86 that connect events of 'sensing' the bicuculline-mediated hyperactivity and the final down-  
87 regulation of AMPARs?

88 Here, we demonstrate a defined mechanism of synaptic scaling accomplished through the  
89 remodelling of miRISC *via* RNA-dependent coordination between translation and proteasome-  
90 mediated degradation. We observe that isolated inhibition of either translation or proteasomal  
91 activity offsets synaptic homeostasis and restoration of homeostasis necessitates the  
92 combination of both processes. We provide empirical evidence demonstrating that a direct  
93 interaction between translation and protein degradation machineries is achieved when the two  
94 apparatus are tethered to actively translating transcripts linked to miRISC. We find that in  
95 contexts of chronic hyperactivity, mTORC1-dependent translation of the E3 ligase Trim32  
96 promotes the degradation of MOV10, both members of the miRISC. Similar to hyperactivity-  
97 driven downscaling, the knockdown of MOV10 is sufficient to decrease the synaptic strength  
98 by reducing surface AMPARs. This occurs due to enhanced Arc expression following loss of  
99 MOV10. Comprehensively, our study shows that mTORC1 is triggered during synaptic  
100 downscaling to effectuate an RNA-dependent, translation-driven protein degradation axis that  
101 regulates miRISC remodelling to adjust the synaptic strength *via* Arc-mediated removal of  
102 surface AMPARs.

103

## 104 **Results**

### 105 **Co-dependence of protein synthesis and degradation drives synaptic homeostasis**

106 To test the existence of coordination between translation and degradation in the regulation of  
107 synaptic homeostasis, we measured miniature EPSCs (mEPSCs) from cultured hippocampal

108 neurons (DIV 18-24) after pharmacological inhibition of protein synthesis (anisomycin, 40 $\mu$ M)  
109 and proteasomal activity (lactacystin, 10 $\mu$ M) for 24 hours. Application of either lactacystin or  
110 anisomycin increased ( $2.99 \pm 1.23$  pA,  $p < 0.02$ ) and decreased ( $5.76 \pm 0.5$  pA,  $p < 0.01$ ) mEPSC  
111 amplitude respectively. Co-application of both inhibitors restored mEPSC amplitude to that of  
112 vehicle treated neurons (Figure 1A-B). The frequency of mEPSCs remained unaltered upon  
113 inhibition of translation and proteasome blockade either alone or in combination (Figure 1C),  
114 suggesting that this could be a post-synaptic phenomenon. Our data implies that interfering  
115 with either protein synthesis or degradation disturbs the balance of synaptic activity, while  
116 blocking both synthesis and degradation altogether restores it. Next, we stimulated synaptic  
117 downscaling using bicuculline (10 $\mu$ M, 24 hr) and observed that like previous reports, here too,  
118 chronic application of bicuculline lead to a significant decrease in mEPSC amplitude ( $5.56 \pm$   
119  $0.31$  pA,  $p < 0.01$ ) without any detectable change in frequency (Figure 1D-F). The extent of  
120 decrease in mEPSC amplitude within bicuculline-treated neurons recapitulated the decrease  
121 observed in neurons where translation was blocked (bicuculline treated neuron  $5.56 \pm 0.31$  pA  
122 decrease vs. anisomycin treated neuron  $5.76 \pm 0.5$  pA decrease) (Figure 1B and 1E). We  
123 measured the mEPSC amplitude and frequency from hippocampal neurons when bicuculline  
124 was co-applied with anisomycin and lactacystin. The dual application of bicuculline and  
125 anisomycin did not result in any significant change in mEPSC amplitude when compared to  
126 neurons treated with bicuculline alone (Figure 1D-E). This confirms that, rather than inducing  
127 an additive effect,

Figure:1

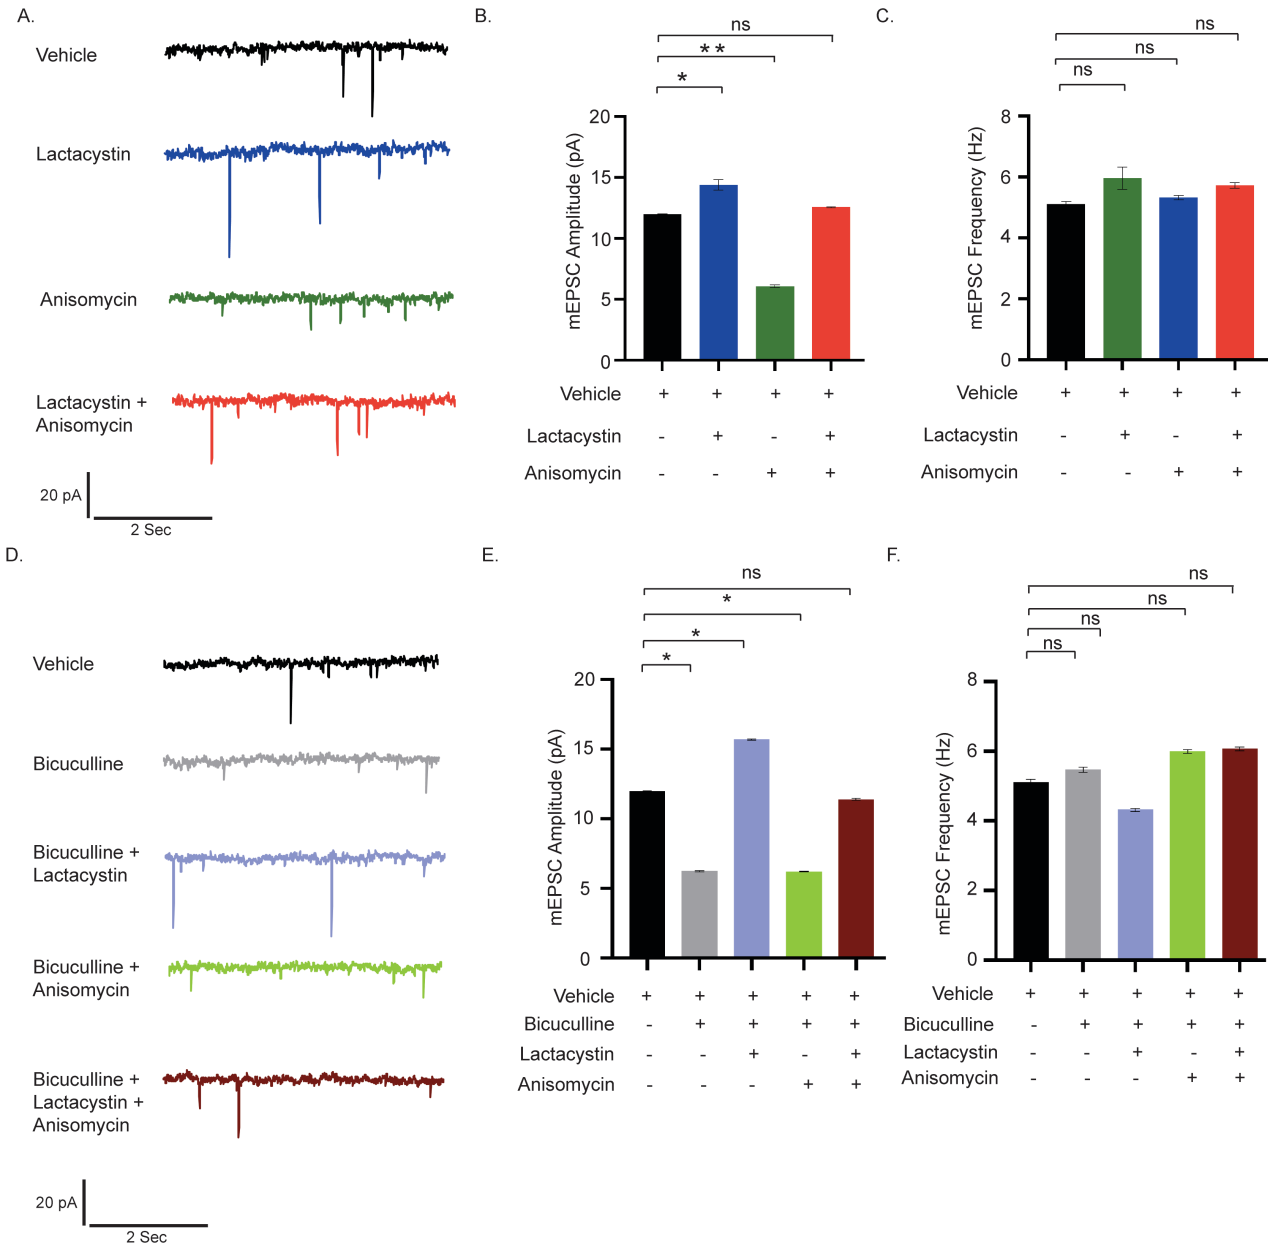

128

129 **Figure 1: Synaptic scaling is co-regulated by protein synthesis and degradation.**

130

131 (A-C) mEPSC traces from hippocampal neurons treated with vehicle, lactacystin, anisomycin and both (A). Mean  
 132 mEPSC amplitude (B) and frequency (C). n=13-15. \*p<0.024, \*\*p<0.01. ns, not significant. Data shown as Mean  
 133 ± SEM. One Way ANOVA and Fisher's LSD. Scale as indicated.

134

135 (D-F) mEPSC traces from neurons treated with vehicle, bicuculline alone or in combination with lactacystin,  
 136 anisomycin (D). Mean mEPSC amplitude (E) and frequency (F). n=12-16. \*p<0.01. ns, not significant. Data  
 137 shown as Mean ± SEM. One Way ANOVA and Fisher's LSD. Scale as indicated.

138 chronic inhibition of protein synthesis in itself is sufficient to induce downscaling and could  
139 potentially override the effect observed due to bicuculline.

140 Disruption of proteasome function by lactacystin during bicuculline-treatment led to a  
141 significant increase in mEPSC amplitude ( $9.45 \pm 0.25$  pA increase as compared to bicuculline  
142 treated neurons,  $p < 0.01$ ) without altering frequency (Figure 1E-F). The increase was effectively  
143 more than the basal activity of vehicle-treated neurons ( $3.88 \pm 0.28$  pA,  $p < 0.01$ ) and mimicked  
144 the increase in mEPSC amplitude brought by lactacystin alone (Fig 1B and 1E). Although the  
145 influence of lactacystin on mEPSC amplitude is opposite to that of anisomycin, their individual  
146 effects override that of bicuculline in each condition. Co-application of both inhibitors during  
147 bicuculline-induced hyperactivation produced mEPSC amplitudes comparable to vehicle  
148 treated neurons (Figure 1E). Our data indicates that the co-inhibition of translation and  
149 degradation restricts any molecular changes away from the basal level, thus, maintaining the  
150 synaptic strength at the established physiological set point.

151

### 152 **Synchronized translation and degradation regulates AMPAR distribution during scaling**

153 Since adjustment of synaptic strengths is directly correlated to the surface distribution of  
154 surface AMPARs (sAMPARs), we measured the surface expression of GluA1 and GluA2  
155 (sGluA1/A2) to identify how concerted mechanisms of synthesis and degradation influence the  
156 distribution of sAMPARs during scaling. Neurons (DIV 21-24) were live-labelled using N-  
157 terminus specific antibodies against GluA1 and GluA2 following bicuculline treatment, either  
158 alone or in presence of both anisomycin and lactacystin for 24 hours and synapses marked by  
159 PSD95.

Figure: 2

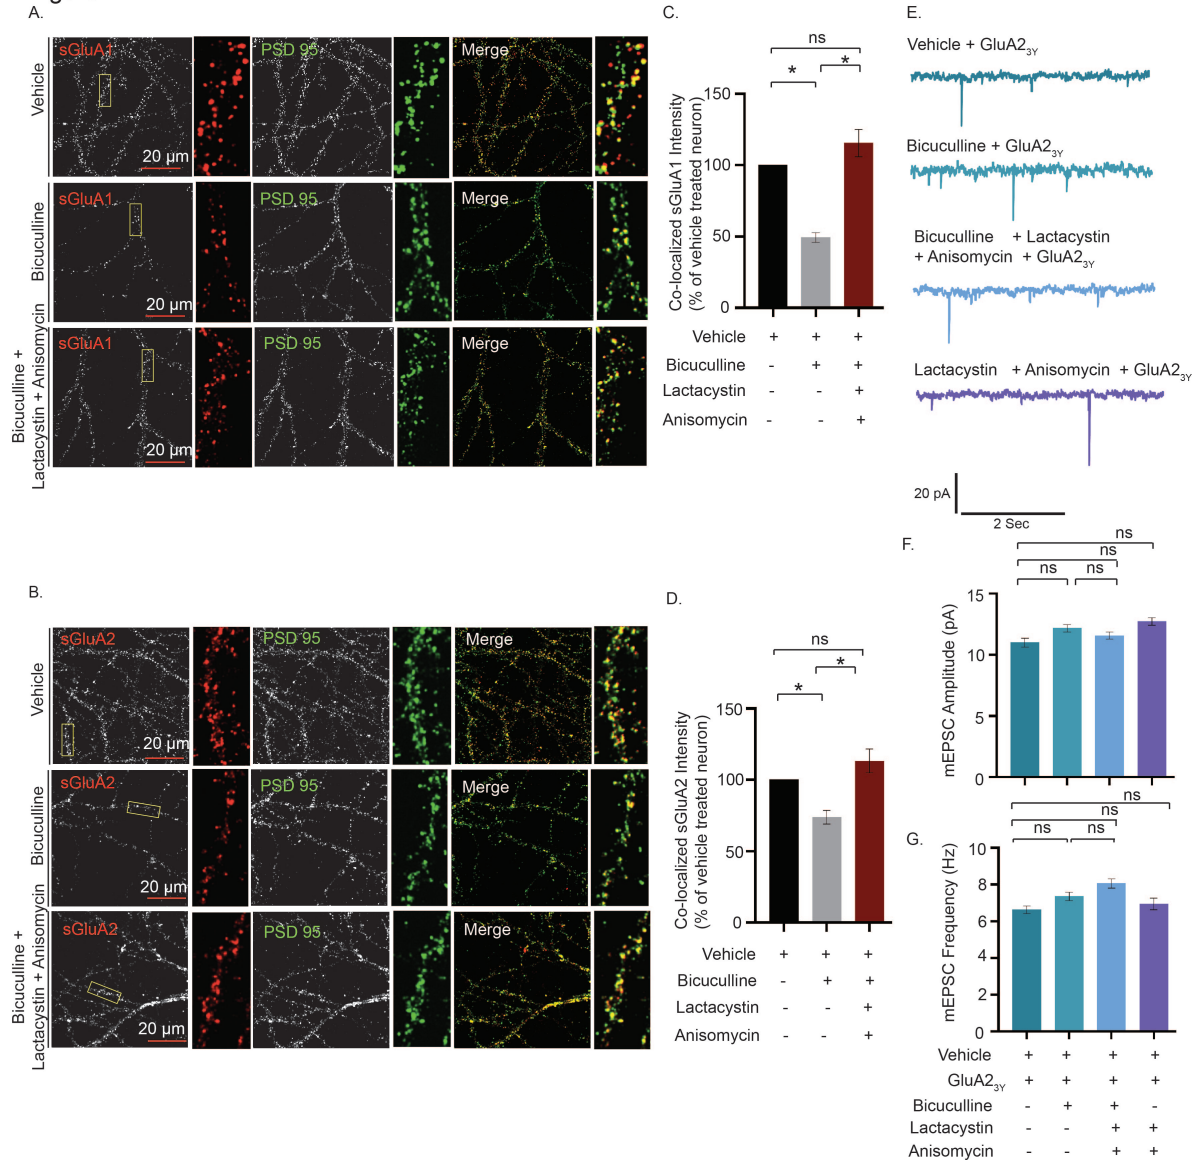

160

161 **Figure 2: Co-inhibition of protein synthesis and degradation restores hyperactivity driven**  
 162 **reduction of synaptic AMPAR expression**

163

164 (A-D) High magnification images of sGluA1 or sGluA2 (red), PSD95 (green) and sGluA1/PSD95 (A) or  
 165 sGluA2/PSD95 (B) (merged) images from neurons treated with vehicle, bicuculline alone or in combination with  
 166 lactacystin and anisomycin. Normalized intensity of sGluA1 (C) or sGluA2 (D) co-localized with PSD95 particles.  
 167 n=56-57, sGluA1 and n=31-63, sGluA2. \*p<0.01. Dendrite marked in yellow box was digitally amplified.

168

169 (E-G) mEPSCs traces from hippocampal neurons treated with GluA<sub>23Y</sub> either alone or in presence of bicuculline,  
 170 lactacystin + anisomycin and bicuculline + lactacystin + anisomycin (E). Mean mEPSC amplitude (F) and

171 frequency (G). n=10 - 13. ns, not significant. Data shown as Mean  $\pm$  SEM. One Way ANOVA and Fisher's LSD.  
172 Scale as indicated. See also Figure S1.

173

174

---

175 The surface expression of sGluA1/A2 in excitatory neurons was decreased following network  
176 hyperactivity ( $50.6 \pm 6.68\%$ ,  $p < 0.01$  for sGluA1 and  $26.1 \pm 6.62\%$ ,  $p < 0.01$  for sGluA2) (Figure  
177 2A-D, S1 A-B). Consistent with our electrophysiological data, inhibition of both the translation  
178 apparatus and the proteasome in bicuculline-treated neurons increased sGluA1/A2 levels  
179 ( $133.95 \pm 8.77\%$ ,  $p < 0.01$  for sGluA1,  $53.17 \pm 6.44\%$ ,  $p < 0.0001$  for sGluA2) when compared to  
180 neurons treated with bicuculline alone (Figure 2C-D, S1A-B). Thus our data indicates that a  
181 dual inhibition of protein synthesis and degradation restores the synaptic sGluA1/A2 following  
182 network hyperactivity.

183

184 To reaffirm whether they are indeed the end-point effectors of synaptic downscaling, we used  
185 GluA2<sub>3Y</sub>, a synthetic peptide derived from the GluA2 carboxy tail of AMPA receptors to block  
186 the endocytosis of the AMPARs (Gainey *et al*, 2009), effectively ensuring the number of  
187 AMPARs to remain unchanged throughout 24 hours. Consistent with previous studies, no  
188 significant changes in mEPSC amplitude were detected upon inhibition of GluA2 endocytosis  
189 during chronic application of bicuculline (GluA2<sub>3Y</sub> treated neuron  $11.18 \pm 1.06$  pA vs. GluA2<sub>3Y</sub>  
190 + bicuculline treated neuron  $12.25 \pm 1.15$  pA,  $p < 0.49$ ) (Figure 2E-F). Application of GluA2<sub>3Y</sub>  
191 did not alter mEPSC amplitude as compared to vehicle treated neurons (GluA2<sub>3Y</sub> treated  
192 neuron  $11.18 \pm 1.06$  vs. vehicle treated neurons  $11.82 \pm 0.24$  pA) (Figure S1C-D), nor any  
193 change observed between neurons treated with GluA2<sub>3Y</sub> and those treated with both  
194 lactacystin and anisomycin in presence or absence of bicuculline (Figure 2F-G). mEPSC  
195 frequency remained unaltered throughout while mEPSC amplitude in each condition was

196 similar to that of control neurons (Figure 2G, S1E). Collectively, these observations indicate  
197 that changes in the abundance of surface-AMPA receptors during scaling is facilitated by proteomic  
198 remodelling that exploits both translation and degradation processes.

199

## 200 **RNA-dependent tethering of the proteasome and translation regulators**

201

202 The co-localization of polyribosomes and proteasomes to sites of synaptic activity (Bingol and  
203 Schuman, 2006; Ostroff et al., 2002) indicate that the proteasomal machinery could remain  
204 physically associated with actively translating transcripts in order to make the necessary  
205 proteomic changes. To evaluate this, we analysed polysomes from the hippocampus of 8-10  
206 week old rat and assessed whether the sedimentation pattern of proteasomes matches those  
207 of actively translating, polyribosome-associated mRNA fractions. We observed that several  
208 components of the proteasomal machinery such as  $\alpha 7$  subunit of 20S; Rpt1, Rpt3 and Rpt6  
209 subunits of the 19S proteasome co-sedimented with translation initiation factors such as  
210 eIF4E, p70S6 kinase and its phosphorylated form, the regulatory kinase of mTORC1-mediated  
211 protein synthesis within actively translating polysomes (Figure 3A-B, S2A). We also detected  
212 the polysomal distribution of MOV10, an RNA binding protein known to be poly-ubiquitinated  
213 upon synaptic activation, and Trim32, an E3 ligase, both components of the miRISC  
214 (Schwamborn *et al*, 2009) (Figure 3A-B).



Figure:3

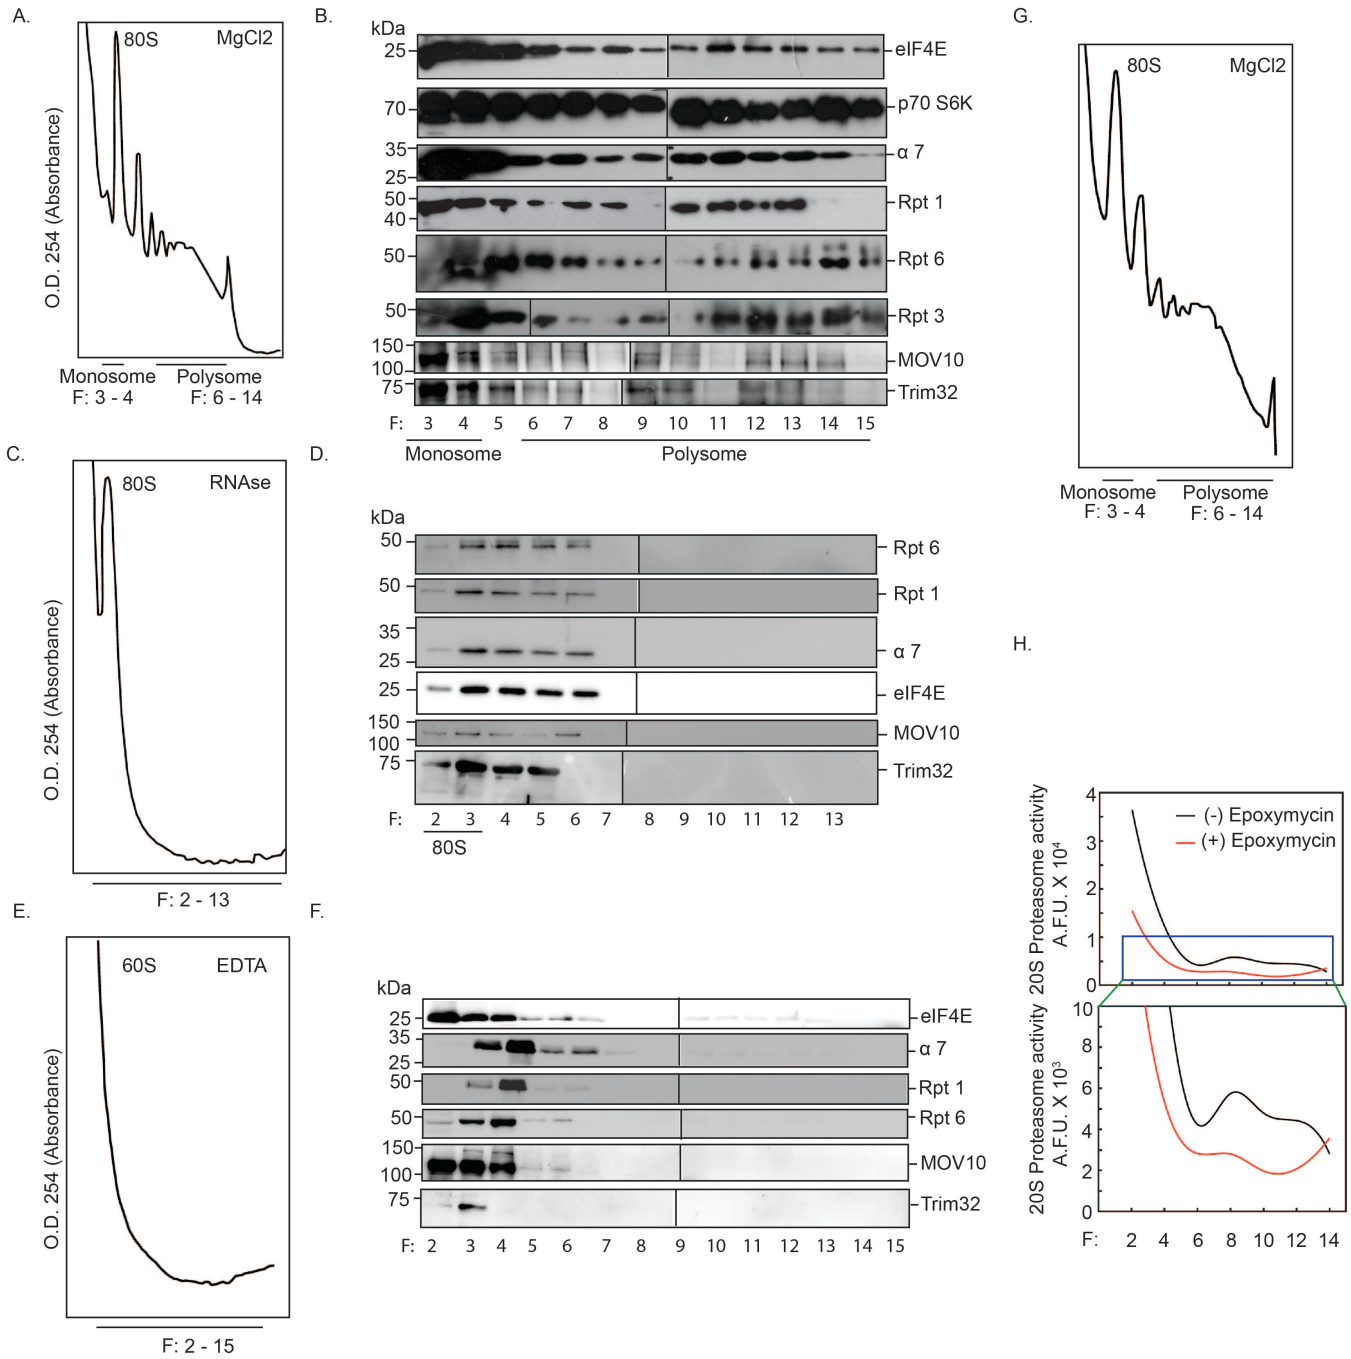

215

216 **Figure 3: RNA-dependent association between active proteasomes and translating polyribosomes**

217

218 (A-F) Absorbance profile at 254nm ( $A_{254}$ ) of fractionated cytoplasmic extracts from hippocampal tissue incubated

219 without (A) or with RNase (C) or with EDTA (E). Monosome (80S) or 60S Ribosome or Polysome fractions as

220 indicated. Western blot analysis of fractions without (B) or with RNase (D) or with EDTA (F) treatment showing



221 distribution of translation regulators eIF4E and p70S6 Kinase;  $\alpha$ 7 subunit of 20S core and Rpt1, Rpt3, Rpt6 of 19S  
222 cap; miRISC proteins MOV10 and Trim32.

223

224 (G-H)  $A_{254}$  profile of fractionated cytoplasmic extract (G) and quantitation of catalytic activity of proteasomes  
225 present in alternate fractions from two polysome preparations (H). See also Figure S2.

226

227

---

228 RNase or EDTA treatment of cytoplasmic lysates prior to density gradient fractionation led to a  
229 complete collapse of the polysome profile, simultaneously shifting the sedimentation of the  
230 proteasome subunits, E3 ligase, translation regulators and RNA binding proteins to the lighter  
231 fractions (Figure 3C-F, S2B-C). The disruption of association between the translational and  
232 proteasomal modules on RNase and EDTA treatment suggests that translating transcripts act  
233 as scaffolds to facilitate their tripartite interaction. These observations ruled out a possible  
234 causality for the observed co-sedimentation due to similar densities of protein complexes  
235 associated with translation and proteasome machineries. Furthermore, we observed that the  
236 polysome-associated 26S proteasome is catalytically active as detected by its ability to cleave  
237 a fluorogenic proteasome substrate that is blocked by proteasome inhibitor epoxymycin  
238 (Figure 3G-H, S2D).

239

240 **Proteasome and the regulators of translation directly interact with each other within**  
241 **excitatory neurons.**

242

243 Whole-cell patch clamp recordings demonstrating that the co-regulation of translation and  
244 proteasome-mediated protein degradation is necessary for synaptic homeostasis, was  
245 measured from excitatory hippocampal neurons.

Figure: 4

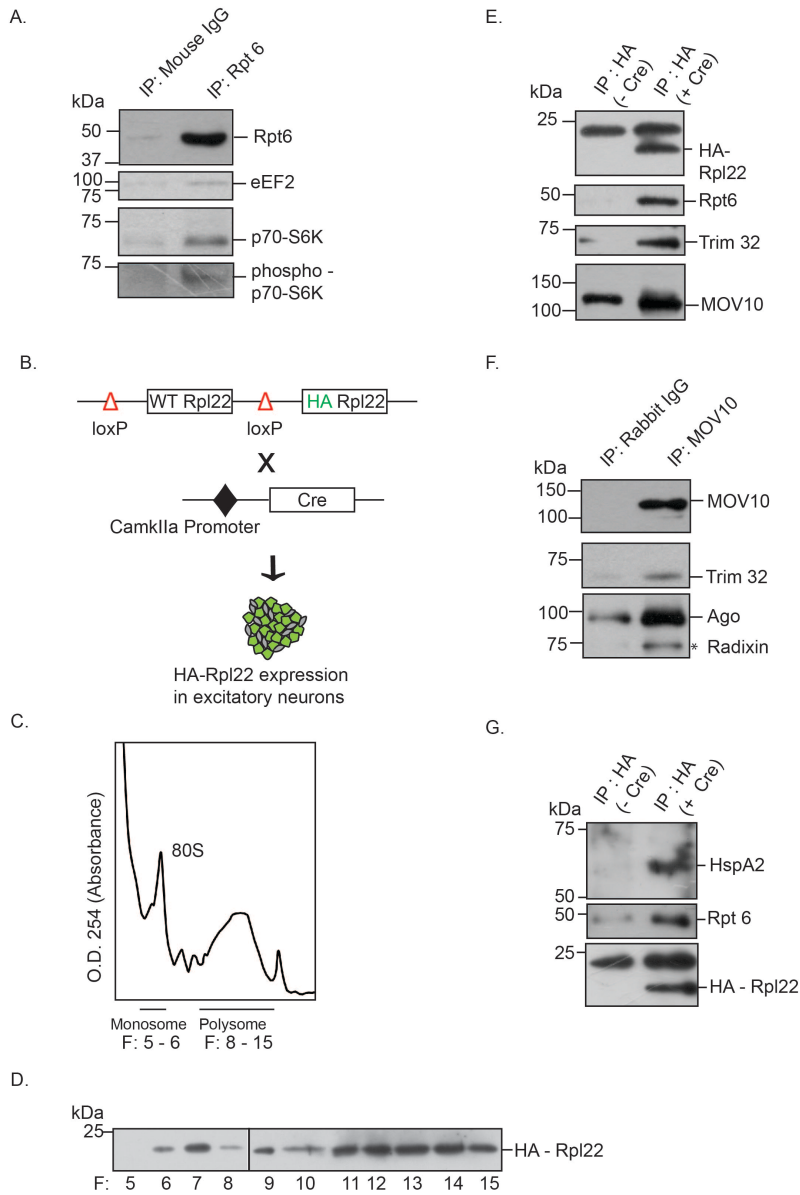

246

247

248 **Figure 4: Interaction between proteasome and actively translating RNA-associated polyribosomes.**

249 (A) Proteasome associated protein complex was immunoprecipitated from hippocampal lysate using antibody  
 250 against Rpt6 and mouse IgG. Western blot of purified protein complex using antibodies against eEF2, p70S6  
 251 Kinase, phospho-p70S6 kinase. (B) RiboTag mouse crossed with CamkIIa promoter- driven Cre recombinase  
 252 mouse results in deletion of wild-type Rpl22 ribosomal protein and replacement of HA tagged Rpl22 in forebrain  
 253 excitatory neurons. (C)  $A_{254}$  profile showing indicated fractions of Monosome and Polysome. (D) Polysome  
 254 fractions showing enrichment of HA-Rpl22 as detected by western blot using antibody against HA. (E) HA-

255 tagged Rpl22 containing polyribosome affinity purified using antibody against HA. Western blot analysis of affinity  
256 purified complex using antibodies against HA, Rpt6, Trim32 and MOV10. (F) MOV10 was immunoprecipitated  
257 from hippocampal lysate. Western blot analysis of MOV10-immunoprecipitated protein complex showed the co-  
258 precipitation of Trim32 with miRISC components MOV10 and Ago. (G) Detection of HspA2 and Rpt6 in HA affinity  
259 purified protein complex from HA-Rpl22 expressing neurons by western blot using antibody against HspA2 and  
260 Rpt6 and HA.

261

262

---

263 Consistent with this observation, co-sedimentation of proteasome subunits along with  
264 translating mRNA linked to protein synthesis regulators including miRISC led us to enquire  
265 whether components of ternary complex directly interact with each other in excitatory neurons  
266 of hippocampus. To evaluate this, we immunoprecipitated the 19S proteasomal complex using  
267 Rpt6 antibody from hippocampal neurons. We observed the co-precipitation of eEF2, a  
268 translation elongation factor that functions as a “sensor” of change in network activity (Figure  
269 4A). We also found that p70S6 kinase as well as its phosphorylated form- a known regulator of  
270 the mTORC1-dependent protein synthesis (Ma & Blenis, 2009) co-precipitated with the 19S  
271 proteasome (Figure 4A). We further analyzed the proteins interacting with polysomes within  
272 excitatory neurons by expressing Hemagglutinin (HA) tagged ribosomal protein Rpl22 (HA-  
273 Rpl22) that gets incorporated into polysomes (Sanz *et al*, 2009; Shigeoka *et al*, 2016) (Figure  
274 4B-D, S2E). We reasoned that the analysis of HA-Rpl22-affinity purified complexes would  
275 confirm whether the polysome-associated translation and degradation machineries directly  
276 interact with each other. Our western blot analysis of HA-Rpl22 affinity-purified protein complex  
277 showed that Rpt6 directly interacts with Trim32 and MOV10 (Figure 4E). The interaction of  
278 MOV10 with ribosomes is crucial as it gives credence to the association of miRNAs with  
279 polysomes, as per previous reports (Krichevsky *et al*, 2003). Immunoprecipitation of MOV10  
280 from hippocampal neurons allowed us to detect the co-precipitation of both Argonaute (Ago)

281 and Trim32, confirming that the latter is an integral component of the Ago-containing miRISC  
282 (Figure 4F). We also detected the chaperone protein HspA2 in the HA-affinity purified fraction  
283 along with Rpt6 (Figure 4G), suggesting that HspA2 could tether proteasomes to actively  
284 translating transcripts.

285

### 286 **Protein synthesis drives mTORC1-dependent proteasomal degradation to cause miRISC** 287 **remodelling during synaptic downscaling**

288

289 Association between MOV10 and Trim32, all members of the miRISC, and their direct  
290 interaction with protein synthesis as well as degradation machineries led us to analyze whether  
291 concerted translation and degradation during bicuculline induced chronic network hyperactivity  
292 could influence miRISC remodelling. Bicuculline treatment of hippocampal neurons (DIV 18 -  
293 21) enhanced ( $101.7 \pm 10.06\%$  increase,  $p < 0.0001$ ) Trim32 with a concomitant decrease  
294 ( $65.94 \pm 2.67\%$  decrease,  $p < 0.001$ ) in MOV10 (Figure 5A-C). The increase in Trim32  
295 expression post bicuculline treatment was blocked by anisomycin and surprisingly resulted in  
296 the inhibition of MOV10 degradation ( $82.28 \pm 12.90\%$  protected MOV10,  $p < 0.03$ ) (Figure 5C).  
297 This indicates that the degradation of MOV10 is dependent on enhanced Trim32 synthesis and  
298 that Trim32 translation precedes the commencement of MOV10 degradation. Treatment with  
299 lactacystin resulted in the expected protection of MOV10 from degradation ( $71.93 \pm 5.74\%$   
300 MOV10 protected,  $p < 0.01$ ) upon bicuculline-induced hyperactivity (Figure 5C); whereas there  
301 remained no change in the Trim32 expression levels (Figure 5B). Moreover, co-application of  
302 lactacystin and anisomycin during bicuculline-induced hyperactivity changed the expression of  
303 MOV10 and Trim32 commensurate to basal levels (Figure 5B-C). We have also analyzed  
304 Trim32 and MOV10 expression after anisomycin and lactacystin treatment, either alone or in

305 combination, to assess the necessity of chronic hyperactivity in the co-ordinated control of  
306 miRISC remodelling. We observed that the chronic inhibition of protein synthesis led to a  
307 modest but statistically significant decrease of both Trim32 ( $22.42 \pm 0.70\%$  decrease,  $p < 0.001$ )  
308 and MOV10 ( $28.14 \pm 0.48\%$  decrease,  $p < 0.0003$ ) (Figure S3A-C). However, chronic inhibition  
309 of proteasome has no effect on Trim32 and MOV10 expression (Figure S3A-C). We reasoned  
310 that the significant decrease of both proteins was observed due to combined effect of global  
311 inhibition of translation and ongoing basal level of protein degradation. These observations  
312 indicate that the miRISC remodelling occurs in conditions of chronic network hyperactivity  
313 induced by bicuculline.

314

315 Reciprocal patterns between MOV10 and Trim32 expression levels led us to analyse whether  
316 the latter is the E3-ligase responsible for the UPS-mediated degradation of MOV10. Consistent  
317 with our hypothesis, knockdown of Trim32 ( $85.43 \pm 4.04\%$  knockdown,  $p < 0.01$ ) by shRNA-  
318 mediated RNAi enhanced the expression of MOV10 ( $44.74 \pm 14.33\%$  increase,  $p < 0.02$ )  
319 (Figure 5D-F), suggesting that Trim32 translation drives the proteasome-mediated degradation  
320 of MOV10 and that it may be sufficient for MOV10 ubiquitination and subsequent degradation.  
321 These observations show that Trim32 translation drives the proteasome-mediated degradation  
322 of MOV10 and suggests that Trim32 may be the only miRISC-associated E3 ligase required  
323 for MOV10 ubiquitination.

Figure: 5

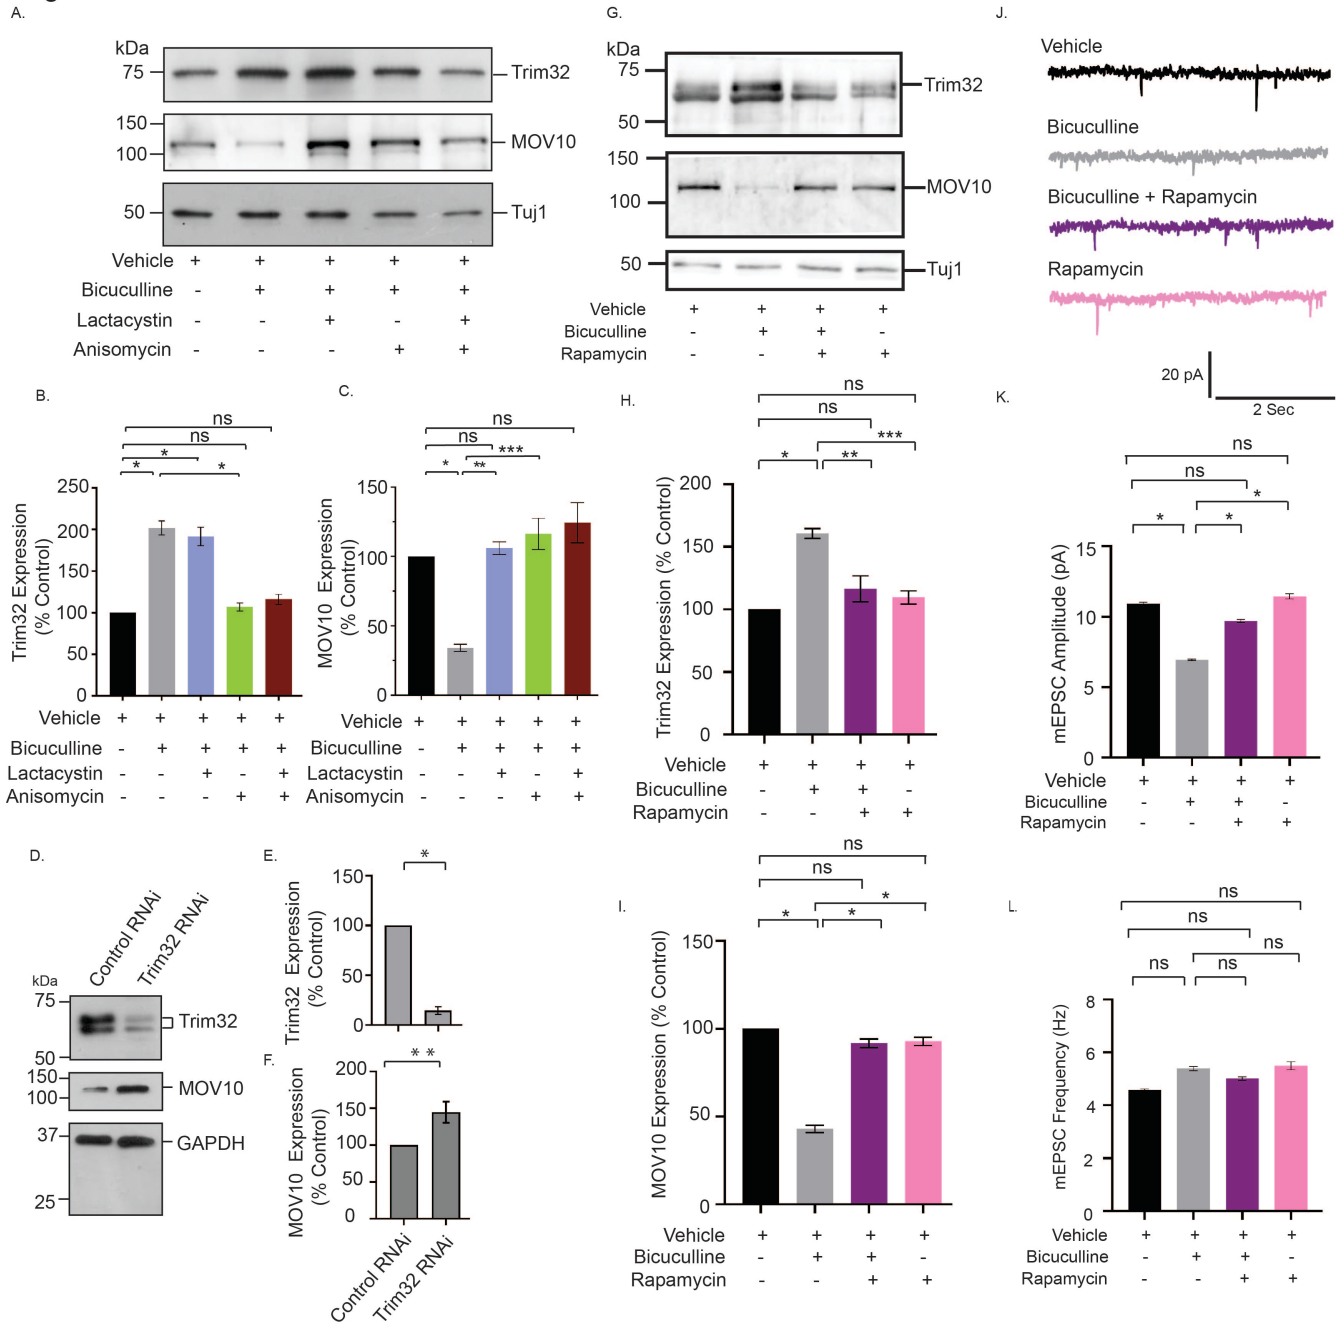

324

325

326

327

328

329

330

**Figure 5: Synthesis of Trim32 facilitates MOV10 degradation and requires activation of mTORC1**

(A-C) Western blot analysis showing the expression of Trim32, MOV10 and Tuj1 from neurons treated with bicuculline with or without lactacystin, anisomycin or both (A). Quantitation of Trim32 (B) and MOV10 (C) expression. n=3. Data shown as Mean  $\pm$  SEM. \* $p < 0.0001$  (B) and \* $p < 0.001$ , \*\* $p < 0.006$ , \*\*\* $p < 0.02$  (C). ns, not significant. One Way ANOVA and Fisher's LSD.

331 (D-F) Western blot analysis of neurons infected with lentivirus expressing Trim32 or non-targetting control shRNA  
332 showing expression of Trim32, MOV10 and Tuj1 (D). Quantitation of Trim32 (E) and MOV10 (F). n=5. Data shown  
333 as Mean  $\pm$  SEM. \*p<0.01, \*\*p<0.02. Unpaired t-test with Welch's correction.

334

335 (G-I) Western blot analysis from neurons treated with bicuculline, Rapamycin or both. showing expression levels  
336 of Trim32, MOV10 and Tuj1 (G). Quantitation of Trim32 (H) MOV10 (I) expression. Data shown as Mean  $\pm$  SEM.  
337 n=5. \*p<0.0001, \*\*p<0.0007, \*\*\*p<0.0001 (H) and \*p<0.001 (I). ns, not significant. One Way ANOVA and  
338 Bonferroni's correction. See also Figure S2.

339

340 (J-L) mEPSC traces from neurons treated with vehicle, bicuculline, rapamycin or both (J). Mean mEPSC  
341 amplitude (K) and frequency (L). n=8-9. \*p<0.01. ns, not significant. Data shown as Mean  $\pm$  SEM. One Way  
342 ANOVA and Fisher's LSD.

343

---

344 Having observed the co-precipitation of the downstream effectors of the mTORC1 signalling  
345 cascade with the 26S proteosomal subunit Rpt6, we focused on identifying whether mTORC1  
346 signalling plays a role in causing synaptic downscaling in response to chronic hyperactivity.  
347 Bicuculline-treatment of hippocampal neurons in the presence of rapamycin (100nM, 24 hr), a  
348 selective inhibitor of mTORC1, completely abolished chronic hyperactivity-driven Trim32  
349 synthesis (16.48  $\pm$  8.6% increase as compared to control, p=0.99) and consecutive MOV10  
350 degradation (8.19  $\pm$  2.81% decrease as compared to control, p=0.06) (Figure 5G-I).  
351 Rapamycin treatment alone did not alter the expression patterns of Trim32 and MOV10 (Figure  
352 5G-I). This led us to hypothesize that mTORC1 pathway acts upstream of Trim32, serving to  
353 regulate its synthesis in response to bicuculline. Chronic bicuculline treatment lead to a  
354 significant enhancement of p70S6 kinase phosphorylation (92.07  $\pm$  20.22 % increase,  
355 p<0.001) which was blocked by rapamycin (Figure S3D-E), indicating that the mTORC1  
356 signalling cascade is key in effectuating bicuculline-induced synaptic downscaling. Consistent  
357 with our biochemical data, we observed that co-incubation of rapamycin and bicuculline  
358 prevented the decrease in mEPSC amplitude (2.47  $\pm$  0.26 pA increase as compared to



359 bicuculline treated neurons,  $p < 0.01$ ) but not frequency (Figure 5J-L). Just as above, rapamycin  
360 treatment alone has no effect, indicating that chronic hyperactivity acts as a triggering point for  
361 mTORC1 activation (Figure 5K-L) and this subsequently plays a role in driving TRIM32  
362 translation.

363

### 364 **MOV10 degradation is sufficient to invoke downscaling of AMPARs**

365

366 MOV10 is an integral component of miRISC and its removal from the protein complex disrupts  
367 miRISC function. MOV10 degradation in response to chronic bicuculline treatment, made us  
368 question whether its loss alone was sufficient to cause pervasive changes in the miRISC and  
369 bring about synaptic downscaling. We mimicked hyperactivity-driven MOV10 degradation by  
370 lentivirus-mediated RNAi of MOV10. Intensity of sGluA1/A2 puncta that co-localized with  
371 PSD95 was analyzed following MOV10 knockdown (DIV21-24). We observed that loss of  
372 MOV10 reduced the expression of sGluA1 ( $35.03 \pm 9.35$  % for shRNA#1,  $p < 0.01$  and  $58.38 \pm$   
373  $10.27$  % for shRNA#2,  $p < 0.01$ ) and sGluA2 ( $49.4 \pm 12.9$ % for shRNA#1,  $p < 0.01$ ) at the  
374 synapses (Figure 6A-D, S4), that recapitulated the re-distribution of sGluA1/sGluA2 in neurons  
375 under chronic bicuculline treatment (Figure 2C-D). The knockdown of MOV10 reduced mEPSC  
376 amplitude ( $3.48 \pm 0.24$  pA for shRNA#1 and  $4.05 \pm 0.23$  pA for shRNA#2,  $p < 0.01$ ) but not  
377 frequency (Figure 6E-G), an observation that mirrors synaptic downscaling following  
378 bicuculline treatment (Figure 1E). We have used two shRNAs against MOV10 for its effective  
379 knockdown and also a non-targeting shRNA to eliminate the possibility of an off-target effect.



Figure: 6

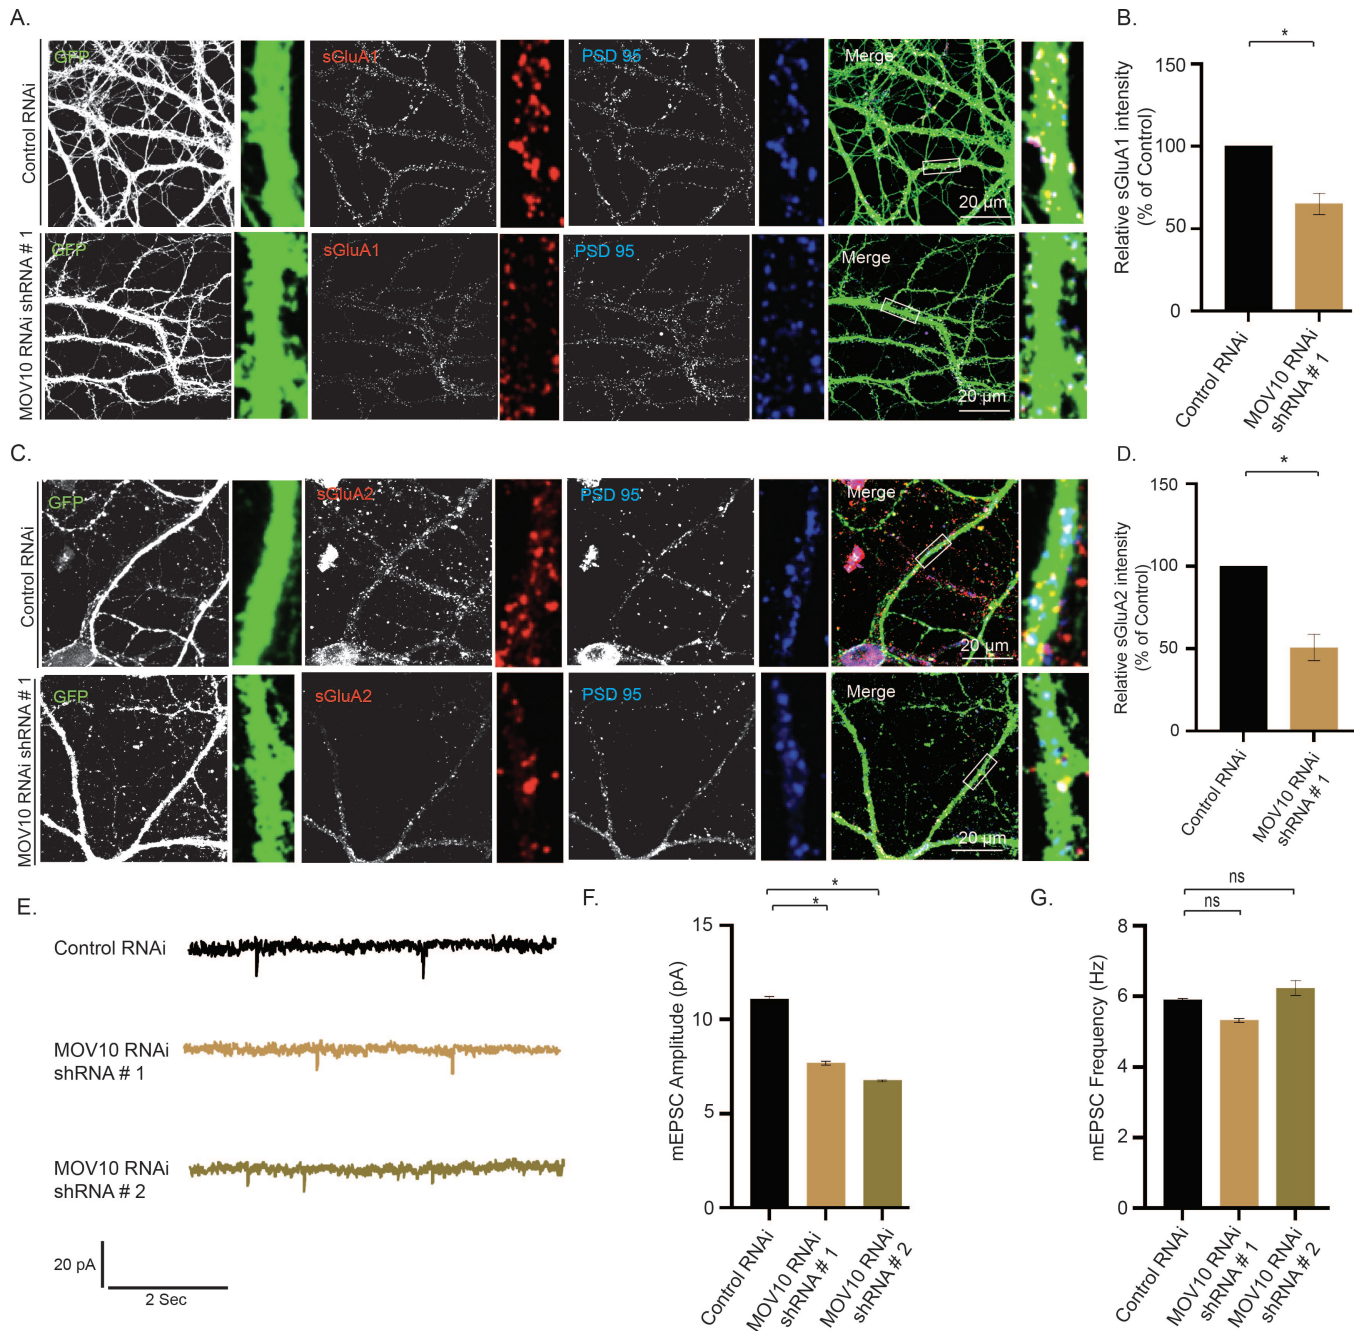

380

381

**Figure 6: MOV10 regulates synaptic activity by modulating abundance of sAMPA**

382

383 (A-D) High magnification images of neurons transduced with lentivirus co-expressing EGFP and MOV10 or non-

384 targeting shRNA showing expression of sGluA1 (A) or sGluA2 (C) (red), PSD95 (blue), GFP (green) and

385 GFP/sGluA1/PSD95 or GFP/sGluA2/PSD95 (merged). Quantitation of normalized intensity of synaptic sGluA1 (B)

386 or sGluA2 (D). n=26 - 30, GluA1; n=12 – 15, GluA2. Data shown as Mean  $\pm$  SEM. \*p<0.01. One Way ANOVA and  
387 Fisher's LSD. Dendrite marked in yellow box was digitally amplified. See also Figure S3.

388

389 (E-G) mEPSC traces from transduced neurons (E). Mean mEPSC amplitude (F) and frequency (G). n=12 – 13.  
390 \*p<0.01. ns, not significant. Data shown as Mean  $\pm$  SEM. One Way ANOVA.

391

392

---

393 How MOV10 degradation leads to the removal of sAMPA receptors to regulate synaptic downscaling?  
394 Arc/Arg3.1, an immediate early gene, has been shown to be dynamically regulated by chronic  
395 changes in synaptic activity, and evokes synaptic scaling (Shepherd *et al*, 2006).  
396 Overexpression of Arc decreases sAMPA receptors *via* endocytosis whereas its knockdown increases  
397 them (Chowdhury *et al*, 2006). Arc expression has been shown to be regulated by diverse  
398 mechanisms including translational control that involves miRNAs (Wibrand *et al*, 2012;  
399 Paolantoni *et al*, 2018). These observation prompted us to analyze the Arc expression  
400 following MOV10 knockdown. We observed that the loss of MOV10 enhanced Arc ( $106.4 \pm$   
401  $11.92\%$  increase, p<0.003 for shRNA # 1 and  $176.1 \pm 20.24\%$  increase, p<0.003 for shRNA #  
402 2) (Figure 7A-B). The extent of increase in Arc protein was commensurate with the efficacy of  
403 two shRNAs against MOV10 (Figure 7A-B). We also observed that this differential  
404 enhancement of Arc is reflected in the proportionate removal of sAMPA receptors and concomitant  
405 decrease in mEPSC amplitude (Figure 6E). Our data showed that bicuculline-induced chronic  
406 hyperactivity, which degrades MOV10, also enhanced Arc expression ( $132.1 \pm 27.45\%$   
407 increase, p<0.04) (Figure 7C-D). This activity-driven enhancement of Arc is blocked by the  
408 inhibition of mTORC1 by rapamycin (100nM, 24 hr). We observed that rapamycin treatment  
409 alone has no effect (Figure 7C-D).

Figure 7

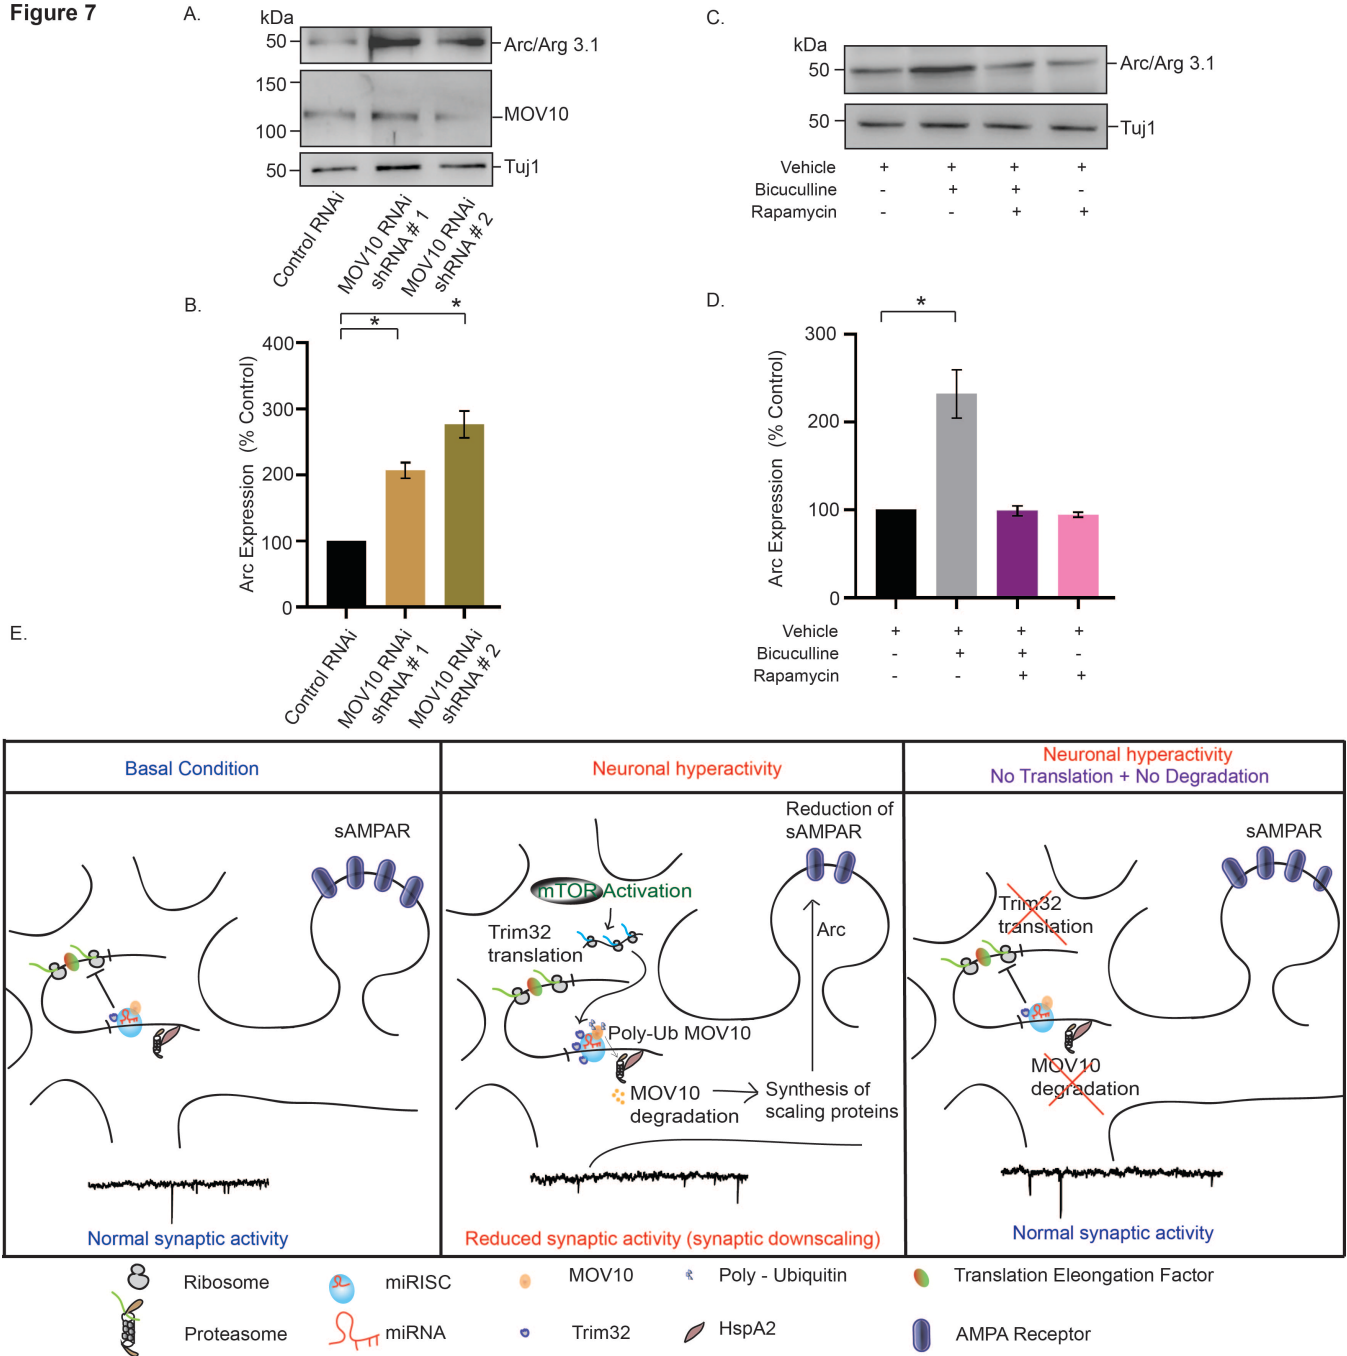

410

411

412 **Figure 7: mTORC1-mediated regulation of Arc expression upon chronic hyperactivity involves**

413 **MOV10**

414 (A-B) Western blot analysis showing the Arc protein level after MOV10 knockdown in neurons infected with

415 lentivirus expressing two different shRNAs against MOV10 (A). Quantitation of Arc expression (B). n=4.\* p<0.003.

416 Data shown as Mean ± SEM. One Way ANOVA and Fisher's LSD.

417

418 (C-D) Western blot analysis of neurons treated with bicuculline in presence or absence of rapamycin showing the  
419 expression of Arc protein (C). Quantitation of Arc expression (D). n=3. \*p<0.04. Data shown as Mean ± SEM.  
420 One Way ANOVA and Fisher's LSD.

421  
422 (E) Schematic representation showing maintenance of homeostatic synaptic activity by coordinated control of  
423 protein synthesis and degradation that modulates composition of miRISC.

---

424  
425 Taken together, our data demonstrates that the bicuculline-induced downscaling of synaptic  
426 strength occurs *via* an mTORC1-mediated translation-dependent proteasomal degradation of  
427 MOV10 involving removal sAMPA receptors *via* Arc (Figure 7E).

## 428 429 **Discussion**

430  
431 Here we provide empirical evidence emphasizing that synchrony between protein synthesis  
432 and proteasomal activity is critical to establish homeostasis at synapses. We used a paradigm  
433 of chronic network hyperactivity to invoke downscaling and determined a) translation and  
434 degradation apparatuses remain linked by RNA scaffolds; b) it is the translation of Trim32 that  
435 drives the degradation of MOV10 to cause miRISC remodelling, thus the current paradigm is  
436 an example of translation preceding degradation; c) miRISC is a key node in the translation-  
437 degradation axis, with mTORC1 being the upstream signalling component which is a part of  
438 the 'sensor' machinery, and Arc-induced removal of sAMPA receptors being the final effectors of  
439 downscaling.

## 440 **Co-regulation of protein synthesis and degradation drives AMPAR-mediated synaptic** 441 **downscaling**

442 We find that chronic perturbation of either translation or proteasomal activity occludes synaptic  
443 homeostasis, while homeostasis remains unperturbed when there is simultaneous inhibition of

444 both. Chronic application of bicuculline along with either lactacystin or anisomycin leads to  
445 alterations of mEPSC amplitude that exactly mirror observations where bicuculline is absent  
446 (Figure 1B vs Figure 1E). Thus, the effects of bicuculline-induced changes to the existing  
447 proteome are overshadowed by those accomplished by the individual action of the proteasome  
448 or the translation machinery (Figures 1). mEPSC frequency remain unaltered in all conditions.  
449 The importance of these observations is multi-faceted; it establishes that, i) congruent protein  
450 synthesis and degradation pathways regulate synaptic scaling; ii) the constancy of the  
451 proteomic pool in the presence of lactacystin and anisomycin renders the effect of any network  
452 destabilizing stimuli like bicuculline to be redundant, and iii) long-term changes in the proteome  
453 predominantly affects the physiology of the post-synaptic compartment.

454 Our observations echo previous findings in Hebbian plasticity; wherein, protein synthesis  
455 during LTP/LTD was required to counter the changes in the proteomic pool triggered by protein  
456 degradation. The blockade of L-LTP accomplished by inhibiting protein synthesis was revoked  
457 on the simultaneous application of proteasomal blockers and translational inhibitors (Fonseca  
458 *et al*, 2006). Abrogation of proteasomal activity allowed mGluR-dependent LTD to proceed  
459 even in the absence of protein synthesis (Klein *et al*, 2015). These observations emphatically  
460 suggest the existence of a proteostasis network that enable compositional changes to the  
461 proteome in contexts of acute or chronic changes in synaptic function (Jayaraj *et al*, 2020;  
462 Cajigas *et al*, 2010; Hanus & Schuman, 2013). As LTP and LTD modify the cellular proteome  
463 through the simultaneous recruitment of protein synthesis and degradation; it stands to reason  
464 that homeostatic scaling mechanisms may also employ a functional synergy of the two to  
465 recompense for the changes brought about by unconstrained Hebbian processes.

466 AMPAR-mediated currents decrease more than NMDAR currents during chronic network  
467 hyperactivity (O'Brien *et al*, 1998; Lissin *et al*, 1998) and unlike NMDARs, the turnover of  
468 AMPARs is translation-dependent (Goold & Nicoll, 2010). The surface distribution of AMPARs,  
469 therefore remain accurate readouts of synaptic output. We wanted to confirm whether the  
470 combined action of translation and degradation affect post-synaptic scaling through any other  
471 effectors and reasoned that if synaptic strength is dominated by changes in AMPAR currents,  
472 restricting changes to the sAMPA abundance should prevent the scaling of mEPSCs even  
473 under chronic hyperactivity. Similar to the observations in synaptic upscaling (Gainey *et al*,  
474 2009), the inhibition of GluA2-endocytosis by GluA2<sub>3Y</sub> peptide also blocked synaptic down  
475 scaling (Figure 2); reinforcing that AMPARs indeed remain the end-point effectors despite  
476 changes to the proteome.

477

478 **RNA-dependent association of the translation and degradation apparatus underlie their**  
479 **functional coherence**

480 The co-localization of polyribosomes and proteasomes in neuronal subcompartments suggest  
481 that for translation and proteasomal degradation to work in tandem, physical proximity between  
482 the two modules cannot be ruled out (Bingol & Schuman, 2006; Ostroff *et al*, 2002). Polysome  
483 analysis showed the co-sedimentation of members of the 19S proteasome (Rpt1, Rpt3 and  
484 Rpt6 subunits) and the 20S proteasome ( $\alpha$ 7 subunit) along with translation initiation factors  
485 such as eIF4E and p70S6 kinase, a downstream effector of mTORC1. Abrogation of the  
486 sedimentation pattern in the presence of RNase and EDTA, is indicative of an RNA-dependent  
487 direct interaction between translation and protein degradation (Figure 3). Affinity purification of  
488 polyribosomes containing HA-Rpl22 confirmed that there is direct interaction between



489 members of the two modules (Figure 4). Such existence of direct interaction between  
490 polyribosome and catalytically active proteasomes allows close temporal coordination between  
491 translation and protein degradation. How do protein degradation machineries remain tethered  
492 to actively translating mRNAs? We have identified that HspA2 (Hsp70 family), a chaperone  
493 protein, remains tethered to proteasomes (Figure 4). Hsp70 family of proteins is known to  
494 influence both the synthesis and degradation of proteins by their association with 26S  
495 proteasomal subunits (Tai *et al*, 2010) and translation initiation factors (Shalgi *et al*, 2013).  
496 HspA2 therefore, is a component of proteostasis coordinators which includes proteasome,  
497 translation regulators and chaperon proteins.

498

#### 499 **mTORC1-mediated Trim32 synthesis precedes MOV10 degradation during downscaling**

500 The co-incident detection of MOV10 and miRNAs from polysome fractions purified from  
501 neurons give credence to the existence of a tripartite (translating RNA associated miRISC –  
502 proteasome complex – translation apparatus) regulatory axis underlying scaling. Under the  
503 chronic influence of bicuculline, synthesis of the E3 ligase Trim32 precedes the degradation of  
504 MOV10, the alternative possibility that MOV10 degradation leads to increased *de novo*  
505 translation of Trim32, is not supported, since protein synthesis inhibition by anisomycin leads  
506 to MOV10 rescue (Figure 5). Loss of the E3-ligase Trim32 elevated the basal level of MOV10,  
507 indicating a ubiquitin-dependent degradation by the proteasome (Figure 5). Although MOV10  
508 has been shown to also regulate miRISC-independent function to modulate RNA modification  
509 (Warkocki *et al*, 2018) and stability (Gregersen *et al*, 2014), association of MOV10 with  
510 Argonaute indeed emphasize the remodelling of miRISC during synaptic downscaling. What  
511 post-synaptic signalling cascade triggers Trim32 translation? We find that chronic bicuculline

512 induction triggers the mTORC1-dependent synthesis of Trim32 that is abrogated on rapamycin  
513 treatment (Figure 5). Identification of the mTOR downstream effector p70S6 kinase within the  
514 tripartite complex further suggests that the mTOR signalling is crucial for driving proteostasis.

515

516 A recent study has demonstrated that a slow turnover of plasticity proteins (measured at 1,3  
517 and 7 days in cultured neurons) is essential to create long-term changes to the neuronal  
518 proteome during both up and down-scaling (Dörrbaum *et al*, 2020).The authors have argued  
519 that the slow turnover rate is more energy-saving and therefore a preferred cellular  
520 mechanism. However, this study also identifies a very small fraction of previously reported  
521 scaling factors with fast turnover rates specifically influencing up- and down- scaling. Our  
522 reports support the latter findings, where we observe that both the increase in Trim32  
523 synthesis and the resulted degradation of MOV10 happen within 24 hours during synaptic  
524 downscaling, suggesting a fast turnover. As both MOV10 and Trim32 are part of the miRISC,  
525 their fast turnover rates seems plausible, considering that participation of the miRISC to relieve  
526 the translational depression of several transcripts encoding plasticity proteins needs to happen  
527 fast in order to boost changes to the proteome. Although in terms of energy expenditure the  
528 coordinated regulation of translation and degradation is expensive, this cellular trade-off may  
529 be necessary to trigger the remodelling of a very limited number of master regulators of the  
530 neuronal proteome, such as miRISC, during synaptic downscaling.

531

### 532 **Degradative control of miRISC remodelling underlies homeostatic scaling**

533 Most studies have focused on the influence of single miRNAs in regulating AMPAR distribution  
534 during scaling, however, they have been inadequate in providing a holistic view of the miRNA-



535 mediated control of synaptic scaling (Hou *et al*, 2015; Letellier *et al*, 2014; Rajman *et al*, 2017;  
536 Silva *et al*, 2019). We found that loss of MOV10 function, single-handedly accounted for the  
537 loss of sGluA1/A2, accompanied by commensurate decrease in mEPSC amplitude, thus  
538 effectively recapitulating the post-synaptic events during downscaling (Figure 6). How  
539 AMPARs are downregulated post chronic bicuculline treatment? Similar to previous  
540 observation (Shepherd *et al*, 2006), our study showed that bicuculline-induced hyperactivity  
541 enhances Arc protein, a key regulator of AMPAR removal from synapses. The enhancement of  
542 Arc expression and reduction of sAMPA receptors after loss of MOV10 demonstrates Arc translation  
543 to be a crucial intermediate between miRISC remodelling and synaptic downscaling. The  
544 expression of Arc has been shown to be regulated by a set of miRNAs (Wibrand *et al*, 2012),  
545 thus reinforcing our hypothesis that in context of chronic hyperactivity miRISC remodelling will  
546 take place prior to the Arc translation.

547 In contrast to chronic hyperactivity driven loss of MOV10, its polyubiquitination and subsequent  
548 localized degradation at active synapses has been shown to occur within minutes upon  
549 glutamate stimulation of hippocampal neurons in culture or during fear memory formation in  
550 amygdala (Banerjee *et al*, 2009; Jarome *et al*, 2011). These observations indicate that MOV10  
551 degradation is a common player involved in both Hebbian and homeostatic forms of plasticity.  
552 Hebbian plasticity paradigms triggers homeostatic scaling in neurons as a compensatory  
553 mechanism (Vitureira & Goda, 2013); these two opposing forms of plasticity must involve a  
554 combination of overlapping and distinct molecular players. Our data demonstrates the  
555 requirement of a rapamycin-sensitive, MOV10 degradation-dependent Arc translation in  
556 homeostatic scaling that is distinct from the rapamycin-insensitive dendritic translation of Arc

557 occurring during Hebbian plasticity (Na *et al*, 2016). We speculate that homeostatic and  
558 Hebbian plasticity engages distinct signalling pathways that converge at miRISC remodelling.  
559 Though most homeostatic scaling studies including ours used hippocampal neurons in culture  
560 to investigate the mechanistic details, the use of this model leaves a lacuna to evaluate how  
561 input-specific gene expression control at selective synapses during Hebbian plasticity  
562 influences compensatory changes across all synaptic inputs to achieve network homeostasis.  
563 Therefore, physiological relevance of homeostatic scaling needs to be studied in association  
564 with Hebbian plasticity in order to delineate factors contributing to proteostasis involving cell  
565 intrinsic and extrinsic variables within a circuit. In this context, the study of synaptic scaling  
566 during sleep poses distinct advantages. Homeostatic downscaling is a key attribute observed  
567 in excitatory neurons during sleep, where, in order to aid the consolidation of contextual  
568 memory, synapses undergo pervasive remodelling by a protein kinase A-dependent  
569 dephosphorylation and removal of sAMPA receptors (Diering *et al*, 2017). Sleep promotes mTORC1-  
570 mediated Arc translation that is necessary for consolidation of ocular dominance plasticity in  
571 the cat visual cortex (Seibt *et al*, 2012). Therefore, impact of sleep in memory consolidation is  
572 an effective paradigm to analyse how proteostasis at the synapses drive the homeostatic  
573 scaling on a larger scale. The kinetics of miRISC-dependent proteome remodelling during  
574 sleep and its correlation with synaptic events may be explored further in order to understand  
575 the extent to which syncretic translation and degradation processes influence the temporal  
576 resolution of scaling during such physiological functions.

577

578

579

580

581 **Author Contributions**

582 S.B and S.S designed the study. S.S., and B.S. performed all experiments. S.S., B.S., and  
583 S.B. analyzed the data. J.P.C. provided critical comments on electrophysiology experiments  
584 and manuscript. S.V.S.M gave comments on manuscript. S.S. and S.B wrote the manuscript.

585

586 **Acknowledgement:**

587 We thank Addgene for lentiviral vectors, Ken Kosik for MOV10 shRNA constructs, microscope  
588 facility of Regional Centre for Biotechnology, India, Utsav Mukherjee for confocal imaging,  
589 Rohini Roy for analyzing efficacy of RNAi and Premkumar Palanisamy for maintenance of  
590 transgenic animals. This work is supported by Ramalingaswami Fellowship from the  
591 Department of Biotechnology, Government of India and National Brain Research Centre core  
592 fund to S.B.

593

594 Authors declare no conflict of interest

595

596 **References:**

597

598

- Banerjee S, Neveu P & Kosik KS (2009) A Coordinated Local Translational Control Point at the Synapse Involving Relief from Silencing and MOV10 Degradation. *Neuron* **64**: 871–884
- Bingol B & Schuman EM (2006) Activity-dependent dynamics and sequestration of proteasomes in dendritic spines. *Nature* **441**: 1144–1148
- Burrone J & Murthy VN (2003) Synaptic gain control and homeostasis. *Curr. Opin. Neurobiol.* **13**: 560–567
- Cajigas IJ, Will T & Schuman EM (2010) Protein homeostasis and synaptic plasticity. *EMBO J.* **29**: 2746–2752
- Chowdhury S, Shepherd JD, Okuno H, Lyford G, Petralia RS, Plath N, Kuhl D, Huganir RL & Worley PF (2006) Arc/Arg3.1 Interacts with the Endocytic Machinery to Regulate AMPA Receptor Trafficking. *Neuron* **52**(3): 445-59.

- Davis GW (2006) Homeostatic control of neural activity: From Phenomenology to Molecular Design. *Annu. Rev. Neurosci.* **29**: 307–323
- Diering GH, Nirujogi RS, Roth RH, Worley PF, Pandey A & Huganir RL (2017) Homer1a drives homeostatic scaling-down of excitatory synapses during sleep. *Science* (80-. ). **355**: 511–515
- Dörrbaum AR, Alvarez-Castelao B, Nassim-Assir B, Langer JD, Schuman EM (2020) Proteome dynamics during homeostatic scaling in cultured neurons. *Elife* **9**: e52939.
- Ehlers MD (2003) Activity level controls postsynaptic composition and signaling via the ubiquitin-proteasome system. *Nat. Neurosci.* **6**: 231–242
- Fonseca R, Vabulas RM, Hartl FU, Bonhoeffer T & Nägerl UV (2006) A Balance of Protein Synthesis and Proteasome-Dependent Degradation Determines the Maintenance of LTP. *Neuron* **52**: 239–245
- Gainey MA, Hurvitz-Wolff JR, Lambo ME & Turrigiano GG (2009) Synaptic scaling requires the GluR2 subunit of the AMPA receptor. *J. Neurosci.* **29**: 6479–6489
- Gould CP & Nicoll RA (2010) Single-Cell Optogenetic Excitation Drives Homeostatic Synaptic Depression. *Neuron* **68**: 512–528
- Gregersen LH, Schueler M, Munschauer M, Mastrobuoni G, Chen W, Kempa S, Dieterich C & Landthaler M (2014) MOV10 Is a 5' to 3' RNA Helicase Contributing to UPF1 mRNA Target Degradation by Translocation along 3' UTRs. *Mol. Cell* **54**: 573–585
- Hanus C & Schuman EM (2013) Proteostasis in complex dendrites. *Nat. Rev. Neurosci.* **14**: 638–648
- Henry FE, McCartney AJ, Neely R, Perez AS, Carruthers CJL, Stuenkel EL, Inoki K & Sutton MA (2012) Retrograde changes in presynaptic function driven by dendritic mTORC1. *J. Neurosci.* **32**: 17128–17142
- Henry FE, Wang X, Serrano D, Perez AS, Carruthers CJL, Stuenkel EL & Sutton MA (2018) A unique homeostatic signaling pathway links synaptic inactivity to postsynaptic mTORC1. *J. Neurosci.* **38**: 2207–2225
- Hou Q, Ruan H, Gilbert J, Wang G, Ma Q, Yao WD & Man HY (2015) MicroRNA miR124 is required for the expression of homeostatic synaptic plasticity. *Nat. Commun.* **6**:10045
- Ibata K, Sun Q & Turrigiano GG (2008) Rapid Synaptic Scaling Induced by Changes in Postsynaptic Firing. *Neuron* **57**: 819–826

- Jakawich SK, Neely RM, Djakovic SN, Patrick GN & Sutton MA (2010) An essential postsynaptic role for the ubiquitin proteasome system in slow homeostatic synaptic plasticity in cultured hippocampal neurons. *Neuroscience* **171**: 1016–1031
- Jayaraj GG, Hipp MS & Ulrich Hartl F (2020) Functional modules of the proteostasis network. *Cold Spring Harb. Perspect. Biol.* **12(1)**: a033951
- Jarome TJ, Werner CT, Kwapis JL, Helmstetter FJ (2011) Activity dependent protein degradation is critical for the formation and stability of fear memory in the amygdala. *PLoS One* **6(9)**:e24349.
- Keck T, Toyozumi T, Chen L, Doiron B, Feldman DE, Fox K, Gerstner W, Haydon PG, Hübener M, Lee HK, Lisman JE, Rose T, Sengpiel F, Stellwagen D, Stryker MP, Turrigiano GG & van Rossum MC (2017) Integrating Hebbian and homeostatic plasticity: The current state of the field and future research directions. *Philos. Trans. R. Soc. B Biol. Sci.* **372**:
- Kenny PJ, Zhou H, Kim M, Skariah G, Khetani RS, Drnevich J, Arcila ML, Kosik KS & Ceman S (2014) MOV10 and FMRP Regulate AGO2 Association with MicroRNA Recognition Elements. *Cell Rep.* **9**: 1729–1741
- Klein ME, Castillo PE & Jordan BA (2015) Coordination between translation and degradation regulates inducibility of mGluR-LTD. *Cell Rep.* **10**: 1459–1466
- Krichevsky AM, King KS, Donahue CP, Khrapko K & Kosik KS (2003) A microRNA array reveals extensive regulation of microRNAs during brain development. *Rna* **9**: 1274–1281
- Letellier M, Elramah S, Mondin M, Soula A, Penn A, Choquet D, Landry M, Thoumine O & Favreaux A (2014) MiR-92a regulates expression of synaptic GluA1-containing AMPA receptors during homeostatic scaling. *Nat. Neurosci.* **17**: 1040–1042
- Lissin D V., Gomperts SN, Carroll RC, Christine CW, Kalman D, Kitamura M, Hardy S, Nicoll RA, Malenka RC & Von Zastrow M (1998) Activity differentially regulates the surface expression of synaptic AMPA and NMDA glutamate receptors. *Proc. Natl. Acad. Sci. U. S. A.* **95**: 7097–7102
- Ma XM & Blenis J (2009) Molecular mechanisms of mTOR-mediated translational control. *Nat. Rev. Mol. Cell Biol.* **10**: 307–318
- Na Y, Park S, Lee C, Kim DK, Park JM, Sockanathan S, Huganir RL & Worley PF (2016) Real-Time Imaging Reveals Properties of Glutamate-Induced Arc/Arg 3.1 Translation in Neuronal Dendrites. *Neuron*

- O'Brien RJ, Kamboj S, Ehlers MD, Rosen KR, Fischbach GD & Huganir RL (1998) Activity-dependent modulation of synaptic AMPA receptor accumulation. *Neuron* **21**: 1067–1078
- Ostroff LE, Fiala JC, Allwardt B & Harris KM (2002) Polyribosomes redistribute from dendritic shafts into spines with enlarged synapses during LTP in developing rat hippocampal slices. *Neuron* **35**: 535–545
- Paolantoni C, Ricciardi S, de Paolis V, Okenwa C, Catalanotto C, Ciotti MT, Cattaneo A, Cogoni C & Giorgi C (2018) Arc 3' UTR splicing leads to dual and antagonistic effects in fine-tuning arc expression upon BDNF signaling. *Front. Mol. Neurosci.* **11**:145.
- Pozo K & Goda Y (2010) Unraveling mechanisms of homeostatic synaptic plasticity. *Neuron* **66**: 337–351
- Rajman M, Metge F, Fiore R, Khudayberdiev S, Aksoy Aksele A, Bicker S, Ruedell Reschke C, Raouf R, Brennan GP, Delanty N, Farrell MA, O'Brien DF, Bauer S, Norwood B, Veno MT, Krüger M, Braun T, Kjems J, Rosenow F, Henshall DC, et al (2017) A microRNA-129-5p/Rbfox crosstalk coordinates homeostatic downscaling of excitatory synapses. *EMBO J.* **36**: 1770–1787
- Sanz E, Yang L, Su T, Morris DR, McKnight GS & Amieux PS (2009) Cell-type-specific isolation of ribosome-associated mRNA from complex tissues. *Proc. Natl. Acad. Sci. U. S. A.* **106**: 13939–13944
- Schanzenbächer CT, Langer JD & Schuman EM (2018) Time- and polarity-dependent proteomic changes associated with homeostatic scaling at central synapses. *Elife* **7**: e33322.
- Schanzenbächer CT, Sambandan S, Langer JD & Schuman EM (2016) Nascent Proteome Remodeling following Homeostatic Scaling at Hippocampal Synapses. *Neuron* **92**: 358–371
- Schwamborn JC, Berezikov E & Knoblich JA (2009) The TRIM-NHL Protein TRIM32 Activates MicroRNAs and Prevents Self-Renewal in Mouse Neural Progenitors. *Cell* **136**: 913–925
- Seibt J, Dumoulin MC, Aton SJ, Coleman T, Watson A, Naidoo N & Frank MG (2012) Protein synthesis during sleep consolidates cortical plasticity in vivo. *Curr. Biol.* **22**(8):676-82
- Shalgi R, Hurt JA, Krykbaeva I, Taipale M, Lindquist S & Burge CB (2013) Widespread Regulation of Translation by Elongation Pausing in Heat Shock. *Mol. Cell* **49**: 439–452
- Shepherd JD, Rumbaugh G, Wu J, Chowdhury S, Plath N, Kuhl D, Huganir RL & Worley PF (2006) Arc/Arg3.1 Mediates Homeostatic Synaptic Scaling of AMPA Receptors. *Neuron*

- Shigeoka T, Jung H, Jung J, Turner-Bridger B, Ohk J, Lin JQ, Amieux PS & Holt CE (2016) Dynamic Axonal Translation in Developing and Mature Visual Circuits. *Cell* **166**: 181–192
- Silva MM, Rodrigues B, Fernandes J, Santos SD, Carreto L, Santos MAS, Pinheiro P & Carvalho AL (2019) MicroRNA-186-5p controls GluA2 surface expression and synaptic scaling in hippocampal neurons. *Proc. Natl. Acad. Sci. U. S. A.* **116**: 5727–5736
- Sutton MA, Ito HT, Cressy P, Kempf C, Woo JC & Schuman EM (2006) Miniature Neurotransmission Stabilizes Synaptic Function via Tonic Suppression of Local Dendritic Protein Synthesis. *Cell* **125**: 785–799
- Sutton MA, Taylor AM, Ito HT, Pham A & Schuman EM (2007) Postsynaptic Decoding of Neural Activity: eEF2 as a Biochemical Sensor Coupling Miniature Synaptic Transmission to Local Protein Synthesis. *Neuron* **55**: 648–661
- Tai HC, Besche H, Goldberg AL & Schuman EM (2010) Characterization of the brain 26S proteasome and its interacting proteins. *Front. Mol. Neurosci.* **3**:12.
- Tatavarty V, Sun Q & Turrigiano GG (2013) How to scale down postsynaptic strength. *J. Neurosci.* **33**: 13179–13189
- Thiagarajan TC, Lindskog M & Tsien RW (2005) Adaptation to synaptic inactivity in hippocampal neurons. *Neuron* **47**: 725–737
- Turrigiano GG (2017) The dialectic of hebb and homeostasis. *Philos. Trans. R. Soc. B Biol. Sci.* **372**: (1715)
- Turrigiano GG & Nelson SB (2004) Homeostatic plasticity in the developing nervous system. *Nat. Rev. Neurosci.* **5**: 97–107
- Vitureira N & Goda Y (2013) The interplay between hebbian and homeostatic synaptic plasticity. *J. Cell Biol.* **203**: 175–186
- Warkocki Z, Krawczyk PS, Adamska D, Bijata K, Garcia-Perez JL & Dziembowski A (2018) Uridylation by TUT4/7 Restricts Retrotransposition of Human LINE-1s. *Cell* **174**: 1537-1548.e29
- Wibrand K, Pai B, Siripornmongkolchai T, Bittins M, Berentsen B, Ofte ML, Weigel A, Skaftnesmo KO & Bramham CR (2012) MicroRNA regulation of the synaptic plasticity-related gene Arc. *PLoS One* **7**(7):e41688.
- Wierenga CJ, Walsh MF & Turrigiano GG (2006) Temporal regulation of the expression locus of homeostatic plasticity. *J. Neurophysiol.* **96**: 2127–2133



1 **Supplementary Information**

2 **Synchrony between translation and proteasome-dependent degradation drives**  
3 **homeostatic scaling in excitatory synapses.**

4 Balakumar Srinivasan<sup>1#</sup>, Sarbani Samaddar<sup>1#</sup>, Sivaram V.S. Mylavarapu<sup>2</sup>, James P.  
5 Clement<sup>3</sup> and Sourav Banerjee<sup>1§</sup>

6 1. National Brain Research Centre, NH-8. Nainwal Mode, Manesar-122052, Haryana, India

7 2. Regional Centre for Biotechnology, NCR-Biotech Science Cluster, Faridabad-Gurgaon  
8 Expressway, Faridabad-121001, Haryana, India

9 3. Neuroscience Unit, Jawaharlal Nehru Centre for Advanced Scientific Research, Jakkur,  
10 Bengaluru-560064, Karnataka, India.

11 # These authors contributed equally to this work

12 § Correspondence

13 [souravnbrc@gmail.com](mailto:souravnbrc@gmail.com) OR [sourav@nbrc.ac.in](mailto:sourav@nbrc.ac.in) (S.B)

14

15

16

17

18

19

20

21

22

23

24

25



26 **Supplementary Figure**

Figure: S1

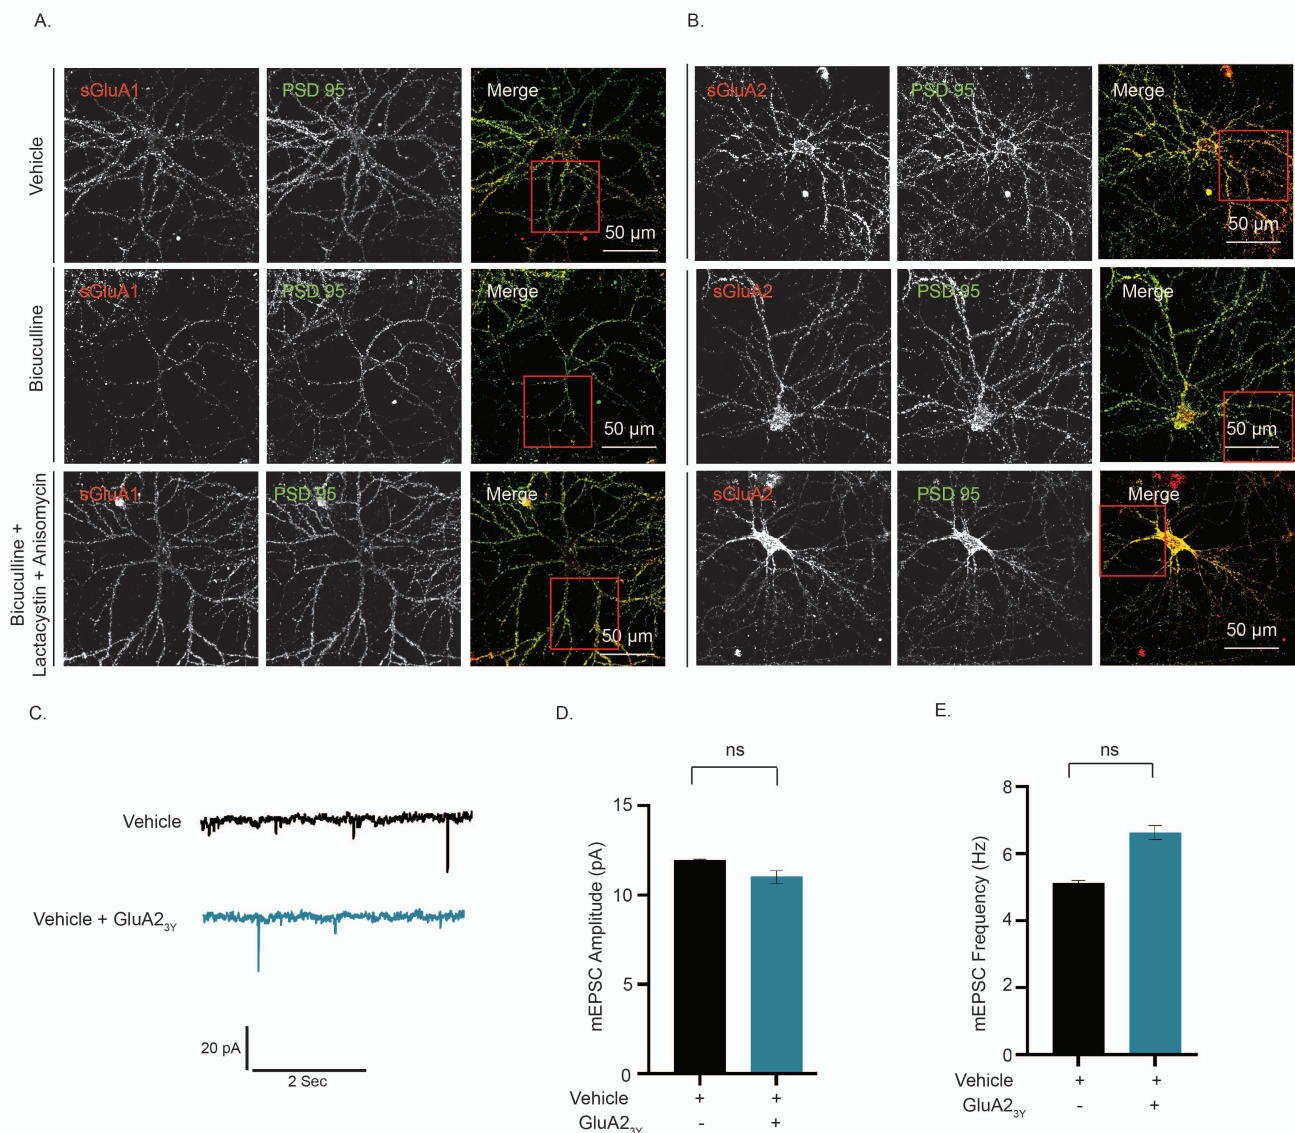

27

28 **Supplementary Figure 1: Synaptic downscaling by coordinated control of protein synthesis**  
29 **and degradation involves AMPARs.**

30 (A-B) Hippocampal neurons were immunostained with GluA1 (A) or GluA2 (B) and PSD95 as  
31 described in Figure 2A-B. Photomicrograph showing images for surface GluA1 or GluA2 (red) and  
32 PSD95 (green) and sGluA1/PSD95 or sGluA2/PSD95 (merged). High magnification images of  
33 dendrites shown in Figure 2 marked in red square. Scale bar as indicated. Quantitation shown in  
34 Figure 2C-D.

35

36 (C-E) mEPSCs traces from hippocampal neurons (DIV18-24) treated with vehicle or GluA23y for  
37 24 hours (C) as described in Figure 2E. Scale as indicated. Mean mEPSC amplitudes (D) and

38 frequencies (E) in neurons treated as indicated. n=12. Data shown as Mean  $\pm$  SEM. One Way  
39 ANOVA and Fisher's LSD.

40

Figure: S2

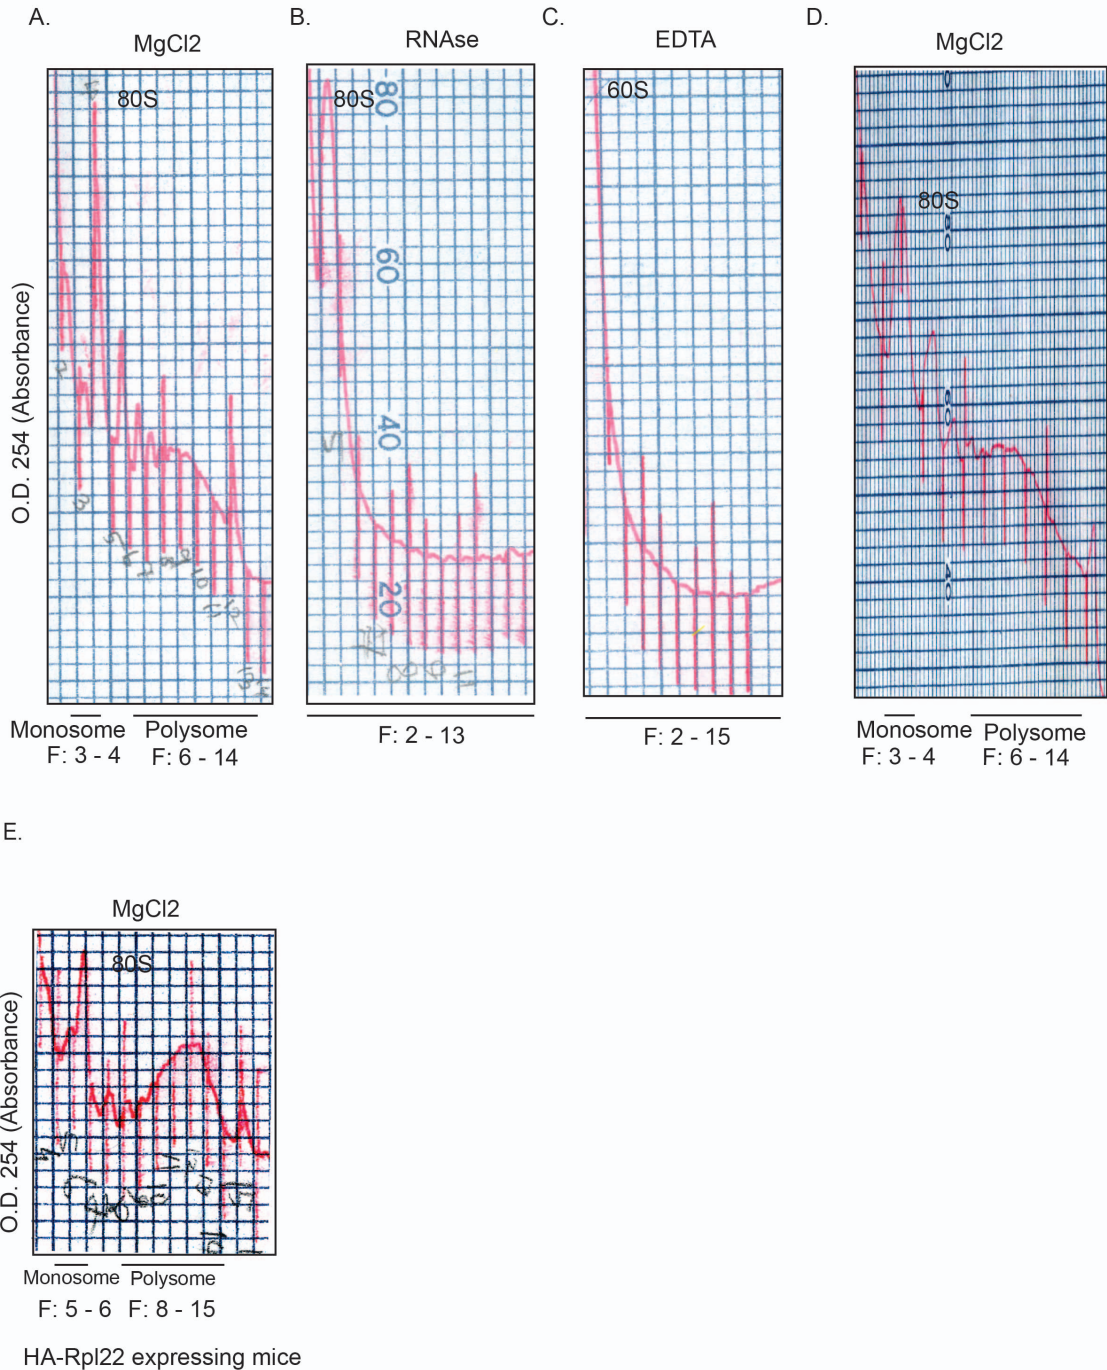

41

42

43 **Supplementary Figure 2: O. D<sub>254</sub> profile of polysome fractionation**

44 (A-E) A<sub>254</sub> profile obtained from spectrophotometer attached gradient fractionator shown in Figure 3  
45 and 4. Traces were drawn from original A<sub>254</sub> profile obtained from cytoplasmic extract treated with

46 MgCl<sub>2</sub> (A), RNase (B), EDTA (C), MgCl<sub>2</sub> (D) shown in Figure 3 and MgCl<sub>2</sub> treated extract from  
 47 mouse expressing HA-Rpl22 in excitatory neurons (E) shown in Figure 4.  
 48

Figure: S3:

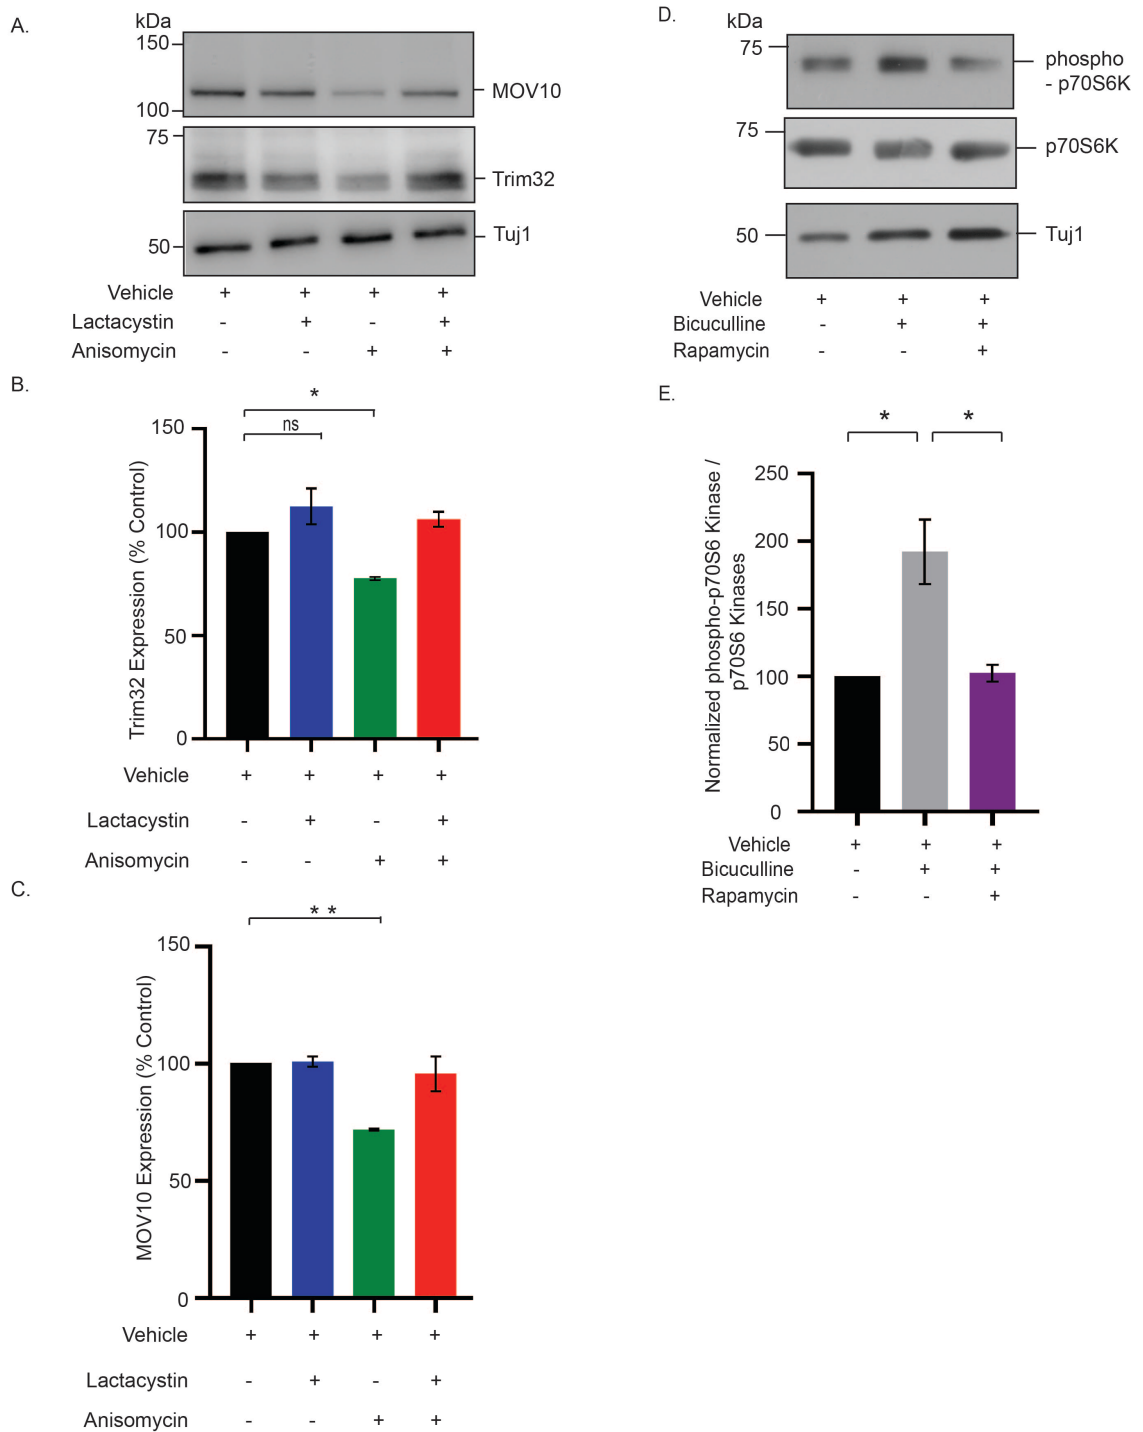

49

50

51 **Supplementary Figure 3: Expression profile of miRISC members and translation regulators**  
 52 **under basal and activity-dependent conditions**

53 (A-C) Hippocampal neurons (DIV21) treated with lactacystin, anisomycin and both for 24  
 54 hours. Photomicrograph showing the expression of Trim32 and MOV10 as detected by



55 western blot analysis (A). Quantitation of Trim32 (B) and MOV10 (C). Data shown as Mean  
56  $\pm$  SEM,  $n=3$ ,  $*p<0.001$  and  $**p<0.0003$ . One Way ANOVA and Fisher's LSD. See also Figure 5.

57  
58 (D-E) Photomicrograph showing bicuculline treatment of hippocampal neurons (DIV21-22)  
59 enhanced phosphorylation of p70S6 Kinase (D). Quantitation of p70 S6 Kinase phosphorylation  
60 (E).  $n=4$ . Data shown as Mean  $\pm$  SEM,  $*p<0.001$ . One Way ANOVA and Fisher's LSD. See also  
61 Figure 5.  
62

Figure: S4

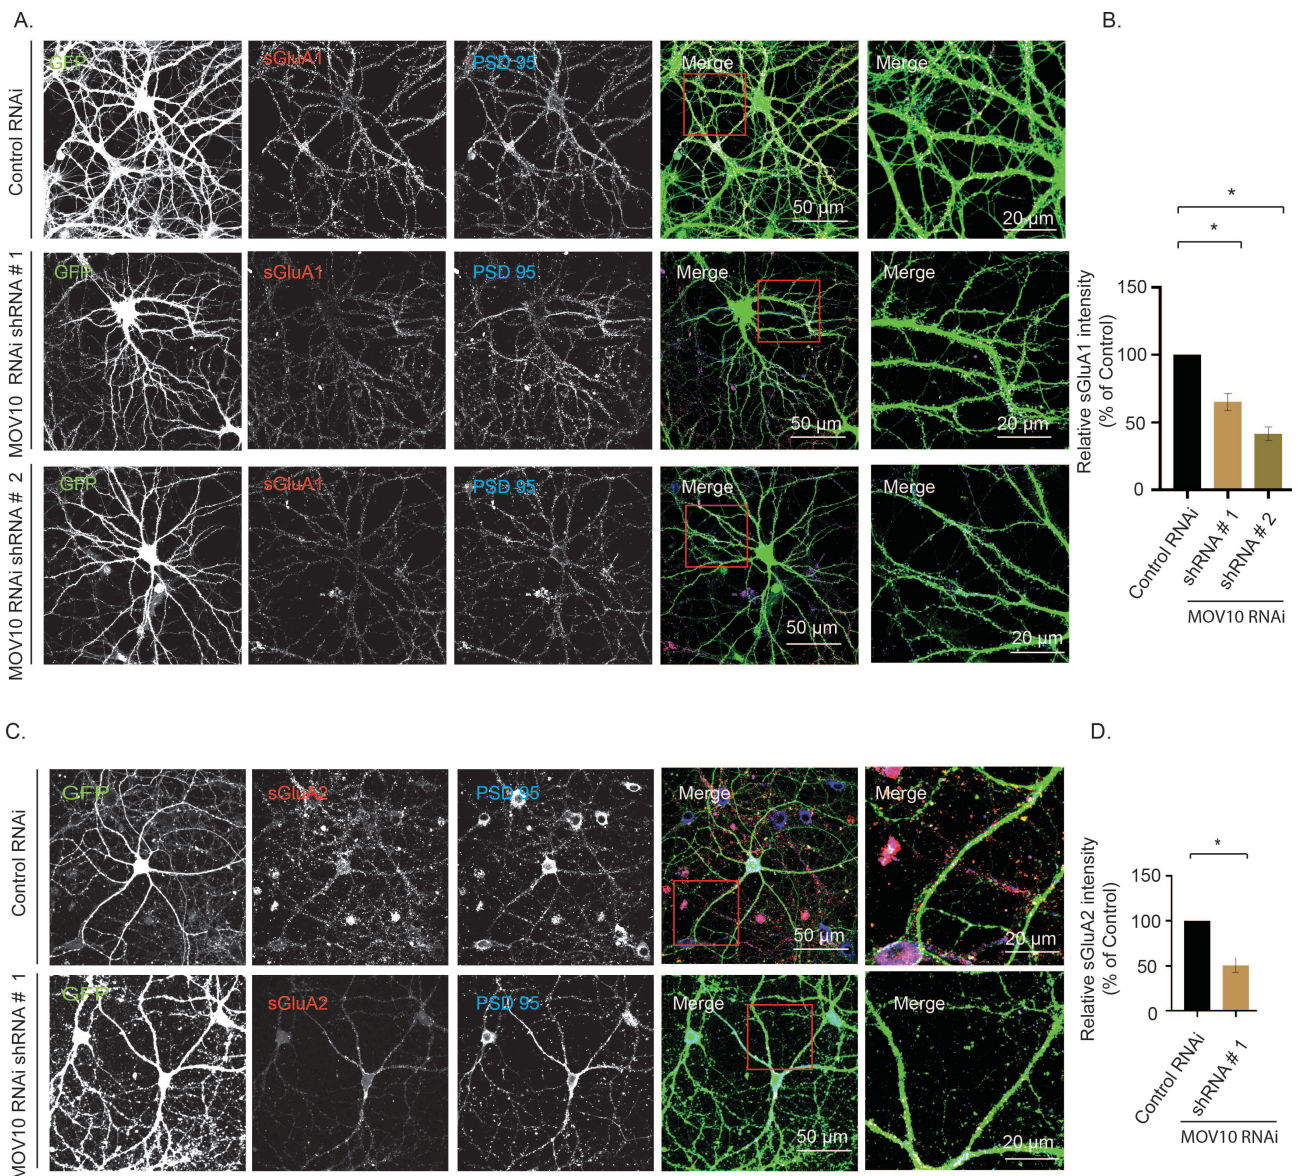

63  
64  
65

66 **Supplementary Figure 4:**

67 **Surface AMPARs expression following MOV10 knockdown**

68 (A-B) Hippocampal neurons (DIV14-15) transduced with lentiviruses expressing two shRNAs  
69 against MOV10 (#1 or # 2) along with GFP. Transduced neurons (DIV21-24) were immunostained  
70 for surface GluA1 and co-immunostained for PSD95. Photomicrograph showing confocal images of  
71 GFP (green), sGluA1 (red), PSD95 (blue) and GFP/sGluA1/PSD95 (merged) (A). High  
72 magnification images of dendrites shown in Figure 6 marked in red square. Relative intensity of  
73 surface GluA1 particles at the synapse (overlap with PSD95 particles onto GFP expressing  
74 dendrites) (B). Normalized intensity of surface GluA1 relative to control was plotted. Data shown as  
75 Mean  $\pm$  SEM. \* $p < 0.01$ . One Way ANOVA and Fisher's LSD.

76  
77 (C-D) Hippocampal neurons (DIV14-15) transduced with lentivirus expressing shRNA against  
78 MOV10 (#1) along with GFP. Transduced neurons (DIV21-24) were immunostained for surface  
79 GluA2 and PSD95. Photomicrograph showing confocal images of GFP (green), sGluA2 (red),  
80 PSD95 (blue) and GFP/sGluA2/PSD95 (merged). High magnification images of dendrites shown in  
81 Figure 6 marked in red square. Scale as indicated. Relative intensity of surface GluA2 particles at  
82 the synapse (overlap with PSD95 particles onto GFP expressing dendrites). Normalized intensity  
83 of surface GluA2 relative to control was plotted. Data shown as Mean  $\pm$  SEM. \* $p < 0.01$ . One Way  
84 ANOVA and Fisher's LSD.

85

86

87

88

89

90

91

92

93

94

95

96

97 **Supplementary Methods**

98

99 **Primary neuronal culture**

100 Hippocampal neuronal cultures from rat (Sprague-Dawley) were prepared and maintained  
101 as described previously (Kaeck & Banker, 2006). Briefly, hippocampi from embryonic day  
102 18 (E18) pups were dissected, treated with trypsin (0.25%), dissociated by trituration to  
103 make single cell suspension and plated onto poly-L-lysine (1mg/ml) coated glass coverslip  
104 (160 – 250 cells / mm<sup>2</sup>). 160 - 170 cells /mm<sup>2</sup> were used for electrophysiology and surface  
105 labeling experiments. 200 - 250 cells /mm<sup>2</sup> cells were used for all biochemical  
106 experiments. Neurons were maintained in Neurobasal medium (Gibco) containing B27  
107 supplements (Gibco) at 5% CO<sub>2</sub> / 37°C up to 25 days prior to commencement of  
108 experiments. Animal experiments were performed with the approval of the Institutional  
109 Animal Ethics (IAEC) committee of National Brain Research Centre.

110

111 **Lentivirus production and transduction**

112 Lentivirus preparations and transduction into hippocampal neuronal cultures were  
113 performed as described previously (Banerjee *et al*, 2009). Validated shRNA against  
114 Trim32 (TATACCTTGCCTGAAGATC) (Schwamborn *et al*, 2009) was cloned into MluI and  
115 ClaI sites of pLVTHM vector (Addgene) and verified by sequencing. pLVTHM vectors  
116 containing MOV10 shRNA cassettes (sh#1:TTATACAAGGAGTTGTAGGTG) or (sh#2:  
117 ACTTAGCTCTAGTTCATAACC) (Banerjee *et al*, 2009) and non-targetting control  
118 (ATCTCGCTTGGGCGAGAGTAAG) were used for lentivirus preparation. *E. coli* Stbl3  
119 strain was used to propagate pLVTHM plasmid and DH5α was used to propagate psPAX2  
120 packaging plasmid (Addgene) and pMD2.G envelop plasmid (Addgene). Purified plasmids  
121 were prepared by Endo Free Maxiprep kit (Qiagen). Lentiviruses were produced by co-

122 transfection of 20µg transfer vector (EGFP cassette under EF1α promoter and shRNA  
123 cassette against MOV10 or Trim32 or non-targeting control under H1 promoter in pLVTHM  
124 plasmid), 15µg psPAX2 and 6µg pMD2.G into HEK293T cells. The cells were grown in low  
125 glucose DMEM media (Gibco) with 10% Fetal Bovine Serum (Gibco) and maintained at  
126 5% CO<sub>2</sub> / 37°C. HEK293T (2×10<sup>6</sup> cells) were transfected by calcium phosphate method.  
127 Following transfections media containing transfection mixture was replaced with fresh  
128 media after 8 hours. Culture supernatant containing lentivirus particles were collected 72  
129 hours post-transfection and concentrated virus stock was prepared by ultracentrifugation.  
130 Viral titers were determined by infecting HEK293T cells followed by FACS analysis.  
131 Typically, titer of concentrated viral stock was 1-2 × 10<sup>7</sup> TU/ml.  
132 To perform RNAi, hippocampal neurons at Days *In Vitro* (DIV) 14-15 were infected with  
133 lentivirus expressing shRNAs against MOV10, Trim32 and non-targeting control  
134 respectively. We have used two shRNAs against MOV10 for its effective knockdown (data  
135 not shown) and also a non-targeting shRNA to eliminate the possibility of an off-target  
136 effect. Viral infections were performed at MOI of 1 for 6 hours and following infection  
137 lentivirus containing media was replaced with fresh Neurobasal media with B27  
138 supplements. Neurons were incubated up to DIV25 prior to surface labeling and  
139 biochemical experiments. Viral infected neurons were tracked by EGFP expression for  
140 electrophysiology and imaging experiments.

141

## 142 **Surface labeling of GluA1/A2**

143 Surface expression of AMPAR subunits (GluA1 or GluA2) was analyzed by live-labeling of  
144 hippocampal neurons with primary antibodies against surface epitopes of GluA1 (Millipore)  
145 or GluA2 (Millipore). Neurons (DIV 21-24) were immunostained as described previously  
146 (Schwarz *et al*, 2010). Prior to immunostaining, neurons were treated with vehicle



147 (DMSO), bicuculline (10 $\mu$ M) alone or in combination with lactacystin (10 $\mu$ M) and  
148 anisomycin (40 $\mu$ M) for 24 hours and transduced with lentivirus for effective knockdown of  
149 MOV10 expression. Live neurons were incubated for 15 minutes at 5% CO<sub>2</sub> / 37°C with N-  
150 terminus specific mouse GluA1 (1:25) or mouse GluA2 (1:10) antibodies diluted in  
151 Neurobasal media containing B27 supplements. Following incubation, the cells were  
152 washed twice with phosphate buffered saline containing Mg<sup>2+</sup> and Ca<sup>2+</sup> (PBS-MC; 137mM  
153 NaCl, 2.7 mM KCl, 10 mM Na<sub>2</sub>HPO<sub>4</sub>, 2mM KH<sub>2</sub>PO<sub>4</sub>, 1 mM Mg<sub>2</sub>Cl<sub>2</sub> and 0.1 mM CaCl<sub>2</sub>).  
154 Cells were then fixed in PBS-MC containing 2% paraformaldehyde and 2% sucrose for 20  
155 minutes at 37°C, washed three times in PBS-MC at room temperature and blocked with  
156 PBS-MC containing 2% BSA for 30 minutes at room temperature. Cells were incubated  
157 with Alexa-546 conjugated goat-anti-mouse secondary antibody (1:200, Invitrogen) at  
158 room temperature for 60 minutes in blocking solution. Cells were permeabilized with PBS-  
159 MC containing 0.1% Triton-X-100 at room temperature for 5 minutes. Cells were further  
160 incubated with blocking solution for 60 minutes and then with goat PSD95 antibody (1:200,  
161 Abcam) for 8 hours at 4°C. Cells were incubated with Alexa-633 or Alexa-488 conjugated  
162 donkey-anti-goat secondary antibody (1:200, Invitrogen) at room temperature for 60  
163 minutes. Cells were washed three times with PBS-MC at room temperature and mounted  
164 on Vectashield mounting media with DAPI (Vector Laboratories).

165

## 166 **Confocal Imaging and Image Analysis**

167 Hippocampal neurons were imaged using a Leica TCS SP8 point scanning confocal  
168 microscope with a Leica Plan Apochromat 63X NA = 1.4 oil immersion objective at 1024 ×  
169 1024 pixel resolution. High magnification images were captured using 2X optical zoom.  
170 We have obtained 4-6 optical sections with 0.5 $\mu$ M step size. GFP and Alexa 488 were  
171 excited by 488 nM Argon laser. Alexa 546 and Alexa 633 were excited by solid state and



172 Helium-Neon lasers respectively. GFP, Alexa 488 and Alexa 546 signals were detected by  
173 hybrid detectors and Alexa 633 was detected by PMT. All images (8 bit) were acquired  
174 with identical settings for laser power, detector gain and pinhole diameter for each  
175 experiment and between experiments.

176 High magnification images, captured from confocal microscopy, were analyzed to observe  
177 the intensity of GluA1/A2 expression colocalizing with PSD95 (and GFP for MOV10 RNAi  
178 experiments). Images from the different channels were stacked and projected at maximum  
179 intensity using ImageJ (NIH). These images were then analyzed using custom written  
180 Matlab (Mathworks) programs. First, PSD95 and GFP image signals were thresholded to  
181 identify the pixels expressing PSD95 and GFP. Then, the pixels of GluA1/A2, colocalizing  
182 with PSD-95 and/or GFP were filtered and the average global intensity of these  
183 colocalizing GluA1 pixels were collected, plotted and further analyzed for statistics.

184

#### 185 **Polysome fractionation and TCA precipitation of polysome fractions:**

186 Polysomes from the hippocampi of 8-10 week old SD rats were analyzed following  
187 previous protocol (Stefani *et al*, 2004). Following decapitation, the brains were removed  
188 and placed in ice-cold HEPES HBSS (HHBSS: 1× Hank's basal salt solution, 2.5 mM  
189 HEPES-KOH pH 7.4, 35 mM glucose, and 4 mM NaHCO<sub>3</sub>) containing 100 µg/ml of  
190 cycloheximide. From this point on, all procedures were done at 4°C. Hippocampi were  
191 dissected, pooled and homogenised in homogenization buffer (10 mM HEPES-KOH pH 7.4,  
192 150 mM KCl, 5 mM MgCl<sub>2</sub>, and 0.5 mM DTT) containing EDTA-free protease and RNase  
193 inhibitors (Roche). 1.2mL of homogenization buffer per four hippocampi were used.  
194 Tissues were homogenised manually with a Dounce homogeniser and the homogenate  
195 was spun at 2000 × g, 10 min at 4°C to discard nucleus. The supernatant (S1) was  
196 collected and NP-40 was added to a final concentration of 1% v/v. After 5 min of

197 incubation on ice, S1 was spun at 20,000 g for 10 min, the resultant supernatant (S2) was  
198 loaded onto a 20-50% w/w linear density gradient of sucrose (Sucrose buffer: 10 mM  
199 HEPES-KOH pH 7.4, 150 mM KCl, 5 mM MgCl<sub>2</sub>). In the indicated conditions, EDTA  
200 (30mM) or a combination of RnaseT1 (Ambion,1000U/mL) and RnaseA (Ambion,40U/mL),  
201 was added to S2 and incubated for 10mins at room temperature before loading it onto the  
202 gradient. The gradients were centrifuged at 40,000 g, 2 hr at 4°C in a Beckman  
203 Instruments (Fullerton, CA) SW 41 rotor. Fractions of 0.75 ml volume were collected with  
204 continuous monitoring at 254 nm using an ISCO UA-6 UV detector. For HA-Rpl22  
205 transgenic mice, exact protocols as above were followed. Hippocampi from 8-10 week old  
206 mice were homogenized and loaded onto the sucrose gradient.

207 Tri-chloroacetic acid (TCA) was added to polysome fractions at 25% of their volume. All  
208 the fractions were incubated on ice for 30 mins post TCA addition followed by  
209 centrifugation at 13,000g for 30 mins at 4°C. The pellets were washed with ice-cold  
210 acetone (Merck) twice and dried. Acetone residues were allowed to evaporate and the  
211 pellets were resuspended in Laemmli buffer.

212

### 213 **Proteasome activity assay**

214 Proteasome activity present in monosome and polysome fractions were analyzed by 20S  
215 Proteasome Assay Kit (Enzo Lifesciences) as per manufacturer's protocol. Briefly, 20S  
216 proteasome chymotrypsin-like activity was tested by incubating 80µl of each fraction with  
217 Suc-LLVY-AMC fluoregenic peptide substrate with or without epoxymycin (500nM) for 15  
218 minutes at 30°C. Fluorescence was detected by fluoremeter (Tecan).

219

220

221

222 **Immunoprecipitation from HA-Rpl22 mice:**

223 HA-tagged ribosomes from adult male mice were immunoprecipitated following previous  
224 protocol (Sanz *et al*, 2009) with minor modifications. RiboTag mice were crossed with  
225 CamKII-Cre mice and CamKII-Cre:RiboTag offspring expressing HA-epitope-tagged-Rpl22  
226 were selected by genotyping. Prior to beginning the experiment, anti-HA-tagged beads  
227 (200µl) were washed twice with citrate-phosphate buffer pH-5, (24mM citric acid, 52mM  
228 dibasic sodium phosphate) and allowed to equilibrate twice for 5 minutes each in  
229 immunoprecipitation buffer (50mM Tris pH-7.5, 100mM KCl, 12mM MgCl<sub>2</sub>, 1% Nonidet P-  
230 40). Hippocampi from three adult (8-10 week old) HA-Rpl22 male mice were taken for  
231 preparing homogenates, along with the same number of age-matched RiboTag mice who  
232 do not express epitope-tagged Rpl22. Hippocampi were rapidly removed and weighed  
233 before homogenization in (10% w/vol) polysome buffer (50mM Tris pH-7.5, 100mM KCl,  
234 12mM MgCl<sub>2</sub>, 1% Nonidet P-40(NP-40), 1mM DTT, 100µg/ml cycloheximide, EDTA free  
235 Roche Protease inhibitor cocktail, 200U/ml RNAse Inhibitor) using a Dounce homogenizer.  
236 Homogenates were then pelleted at 5000g, 10 minutes at 4°C followed by collection of  
237 supernatant and re-centrifugation of the supernatant at 10,000g for 10 minutes at 4°C to  
238 create a post-mitochondrial supernatant. The supernatant was pre-cleared with protein-G  
239 agarose beads (Invitrogen) for 1 hour, followed by centrifugation at 8000g, 4°C, for 10  
240 minutes to remove the beads. 2% of the total volume was kept aside as total input. The  
241 supernatant (250µl) was then incubated with the equilibrated anti-HA tagged affinity matrix  
242 for 6 hours with continuous mixing. The matrix was recovered by centrifugation at 8000g,  
243 4°C for 15 minutes followed by two washes with high salt buffer HS-150 (Tris 50mM pH-  
244 7.5, KCl 150mM, MgCl<sub>2</sub> 12mM, 1% NP-40, DTT 1mM, 100µg/ml cycloheximide, protease  
245 and RNAse inhibitors as above) for 5 minutes and two washes with high salt buffer HS-300  
246 (Tris 50mM pH-7.5, KCl 300mM, MgCl<sub>2</sub> 12mM, 1% NP-40, DTT 1mM, 100µg/ml

247 cycloheximide, protease and RNase inhibitors as above) for 5 minutes. All procedures  
248 were done at 4°C. The pellets were boiled in Laemmli buffer and supernatant was used for  
249 Western Blot analysis.

250

251 **Immunoprecipitation of 26S proteasome subunits and MOV10 from rodent**  
252 **hippocampus:**

253 Hippocampi of four adult (8-10 week old) male Sprague Dawley rats were collected and  
254 homogenized in tissue lysis buffer (50mM Tris pH-7.5, 150mM NaCl, 1% NP-40, 2mM  
255 EDTA, Roche protease inhibitor cocktail, 200U/ml Invitrogen RNase inhibitor, and  
256 phosphatase inhibitor cocktail (Sigma)) (10% w/vol) using a Dounce homogenizer. Prior to  
257 this, recombinant protein G-agarose beads (Invitrogen) were equilibrated in wash buffer  
258 WB-150 (10mM Tris pH8, 150mM NaCl, and 0.1% NP-40) twice for 5 mins each and  
259 centrifuged at 5000g for 2 minutes at 4°C to recover. The homogenates were centrifuged  
260 at 2000g, 4°C for 10 minutes followed by collection of supernatant and re-centrifugation at  
261 10,000g at 4°C for 15 minutes to get a post-mitochondrial supernatant. Protein content of  
262 the supernatant was measured using the BCA protein estimation method (Pierce). 2% of  
263 the total protein content was kept aside as total input and the remaining was divided into  
264 two parts having equal protein content (~250µl each); one to be used for isotype control  
265 and the other for experiment purposes. Protein-G agarose beads were added (20µg) to  
266 each part and allowed to incubate with continuous mixing at 4°C for 1 hour. The pre-  
267 cleared supernatants were collected by centrifugation at 5000g for 10 minutes at 4°C. To  
268 the control fraction, 5µg of IgG isotype control was added (Mouse IgG in case of Rpt6 and  
269 Rabbit IgG in case of MOV10 immunoprecipitation). To the experimental fractions, 5µg of  
270 Rpt6 or MOV10 antibody was added and both fractions were allowed to incubate for 4  
271 hours with continuous mixing. 40µg of proteinG agarose beads were added to the fractions

272 and further incubated for 2 hours. The beads were recovered by centrifugation and  
273 washed twice with wash buffer IPP-150 (50mM Tris pH7.5, 150mM NaCl, 12mM MgCl<sub>2</sub>,  
274 1% NP-40 and 0.5 mMDTT along with RNase, protease and phosphatase inhibitors, see  
275 reagent list) followed by twice with IPP-300 (same constituents as IPP-150 except NaCl  
276 concentration is 300mM). In case of Rpt6, a further stringent wash with IPP-450 (450mM  
277 NaCl, rest same as IPP-150) was required. All procedures were done at 4<sup>0</sup>C. The total  
278 input, control and the immunoprecipitated samples were boiled in Laemmli buffer and  
279 stored for further analysis.

280  
281 **Western Blot for immunoprecipitated samples and polysomes:**

282 Immunoprecipitated samples were analyzed as per previous protocols (Banerjee *et al*,  
283 2009). Briefly, samples were boiled in Laemmli buffer and equal volumes resolved on a 8-  
284 10% SDS-PAGE. Post transfer of proteins on nitrocellulose membrane (Millipore), blots  
285 were blocked with 5% BSA for 1 hour and probed with primary antibodies overnight. In  
286 case of MOV10 IP samples, immunoblotting was done against itself (Bethyl Lab), Trim32  
287 (Abcam) and Ago (Millipore). In case of Rpt6 IP samples, blots were probed for eEF2  
288 (CST) p70S6 kinase (CST),phospho-P70S6 kinase and Rpt6 itself (Enzo) overnight at  
289 4°C. See Reagent details for more information. Following extensive washing with Tris-  
290 Buffer-Saline containing 0.1% Tween-20 (0.1%TBST), secondary antibody supplied with  
291 the CleanBlot HRP detection kit (Thermo Scientific) was used to detect the proteins using  
292 standard chemiluminescence detection on X-ray films. Band intensities were quantified by  
293 densitometry using ImageJ software.

294 Equal volumes of TCA-precipitated polysome fractions were resolved on 8-10% SDS-  
295 PAGE and transferred onto PVDF membranes. Following blocking with 5% BSA, blots  
296 were probed with Rpt6, Rpt1, Rpt3 and 20Sα core subunit (Enzo), eIF4E and p70 S6

297 kinase (CST) overnight at 4°C. Post incubation, blots were washed with 0.1% TBST and  
298 probed with appropriate secondary antibodies. Blots were detected using standard  
299 chemiluminescence (Millipore ) detection.

300

### 301 **Western Blot for primary neuron cultures:**

302 Cultured rat hippocampal neurons (DIV 21-24) were incubated with bicuculline (10 $\mu$ M),  
303 anisomycin (40 $\mu$ M), lactacystin (10 $\mu$ M), rapamycin (100nM) alone or in combination for 24  
304 hours. Post incubation, cells were washed twice in pre-warmed phosphate buffer saline  
305 and collected in Laemmli buffer . Equal volumes of lysates were resolved on 8-10% SDS-  
306 PAGE, transferred onto nitrocellulose membrane, blocked with 5% BSA and probed with  
307 antibodies against MOV10 and Trim32. For each lane, immunoblotting was also performed  
308 with Tuj1 (Sigma) or as the internal control to normalize protein levels. Blots were detected  
309 using standard ECL chemiluminescence detection (Millipore) and band intensity  
310 determined by ImageJ. MOV10 and Trim32 RNAi samples were also detected similarly,  
311 but using GAPDH (Sigma) as the internal control.

312

### 313 **Electrophysiology**

314 Whole cell patch clamp experiments were performed using primary hippocampal neurons  
315 (DIV18-25). Neurons were incubated with bicuculline (10 $\mu$ M), anisomycin (40 $\mu$ M),  
316 lactacystin (10 $\mu$ M), rapamycin (100nM) and GluA23y (10 $\mu$ M) for 24 hours. Neurons were  
317 patched with glass micro-electrodes with an open-tip resistance of 3-8M $\Omega$ . Cells with  
318 series resistance >30M $\Omega$  were excluded from the analysis. To measure the excitatory  
319 currents, the following composition of internal solution was used: 100mM Cesium  
320 gluconate, 0.2mM EGTA, 5mM MgCl<sub>2</sub>, 2mM ATP, 0.3mM GTP, 40mM HEPES, pH 7.2  
321 (285-290 mOsm). Miniature EPSCs (mEPSCs) were recorded by holding the cells at -

322 70mV in a recording solution consisting of: 119mM NaCl, 5mM KCl, 2mM CaCl<sub>2</sub>, 2mM  
323 MgCl<sub>2</sub>, 30mM glucose, 10mM HEPES, pH7.4 (310-320 mOsm) in the presence of 1μM  
324 tetrodotoxin and 10μM Bicuculline.

325 Average of mEPSC events for 300s from each neuron was analyzed and only the events  
326 with <-4pA of peak amplitudes, >0.3pA/ms of rise rates, and 1-12ms of decay time  
327 constants were selected for the analysis.

328 All recorded signals were amplified by Multiclamp 700B (Molecular devices), filtered at 10  
329 Khz and digitised at 10-50 KHz. Analog to digital conversion was performed using Digidata  
330 1440A (Molecular Devices). All data were acquired and analysed using pClamp10.5  
331 software (Molecular Devices) and custom Matlab filtering algorithms. Cells with holding  
332 currents greater than -100pA were excluded from the analysis, as well as any cell which  
333 was unstable during the recording.

334

### 335 **Statistical Analysis:**

336 Statistical Analyses were performed for all experiments. Whole cell patch clamp  
337 amplitudes and frequencies were analyzed using one-way ANOVA with post-hoc Fisher's  
338 LSD test to test pairwise differences across the groups. Imaging and western blot data  
339 were analyzed for statistical significance using one-way ANOVA with post-hoc Fisher's  
340 LSD test. Western blot data related to RNAi experiment was analyzed using unpaired t-  
341 test with Welch's correction. Data is reported as absolute differences in mean ± SEM for  
342 electrophysiology data or percent differences in mean ± SEM for imaging and western blot  
343 data between groups.

344

345

346



347 **References:**

348

- Banerjee S, Neveu P & Kosik KS (2009) A Coordinated Local Translational Control Point at the Synapse Involving Relief from Silencing and MOV10 Degradation. *Neuron* **64**: 871–884
- Kaech S & Banker G (2006) Culturing hippocampal neurons. *Nat. Protoc.* **1**: 2406–2415
- Sanz E, Yang L, Su T, Morris DR, McKnight GS & Amieux PS (2009) Cell-type-specific isolation of ribosome-associated mRNA from complex tissues. *Proc. Natl. Acad. Sci. U. S. A.* **106**: 13939–13944
- Schwamborn JC, Berezikov E & Knoblich JA (2009) The TRIM-NHL Protein TRIM32 Activates MicroRNAs and Prevents Self-Renewal in Mouse Neural Progenitors. *Cell* **136**: 913–925
- Schwarz LA, Hall BJ & Patrick GN (2010) Activity-dependent ubiquitination of GluA1 mediates a distinct AMPA receptor endocytosis and sorting pathway. *J. Neurosci.* **30**: 16718–16729
- Stefani G, Fraser CE, Darnell JC & Darnell RB (2004) Fragile X mental retardation protein is associated with translating polyribosomes in neuronal cells. *J. Neurosci.* **24**: 7272–7276
